# Supplementary material
Source: PubMed Central journal article supplement (PMC3951936)
Supplement: mmc1.pdf [file mmc1.pdf]

The American Journal of Human Genetics, Volume 94

Supplemental Data

## **Early Austronesians: Into and Out of Taiwan**

Albert Min-Shan Ko, Chung-Yu Chen, Qiaomei Fu, Frederick Delfin, Mingkun Li, Hung-Lin Chiu, Mark Stoneking, and Ying-Chin Ko

**Figure S1. Sampling locations**

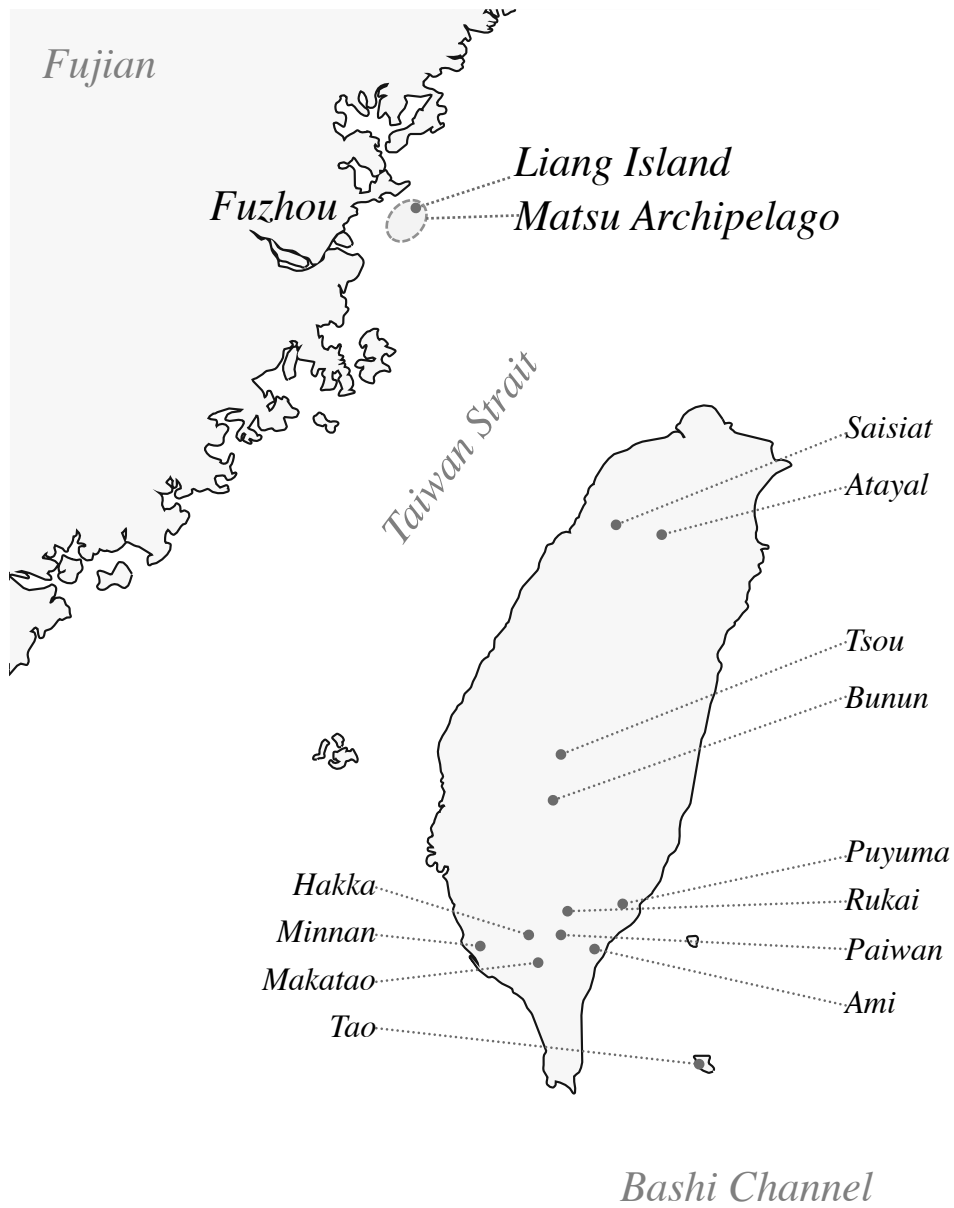

Location of the Liang Island (solid dot) within the Matsu Archipelago of Taiwan (shaded circle) and the 12 Taiwanese groups (solid dots; refer to Table S1 for coordinates)

**Figure S2. Archeology of the Liangdao Man**

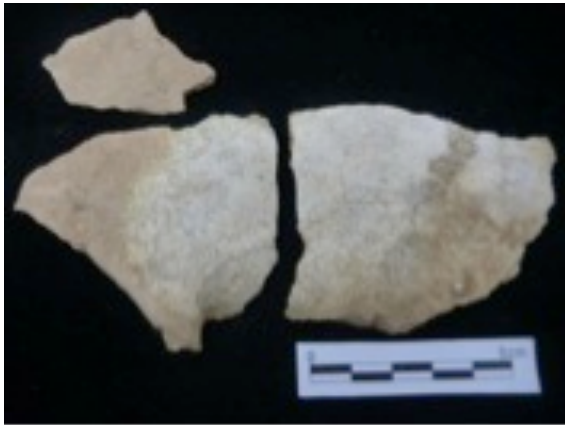

(a) From the LDDW-I site, three human parietal bone fragments exposed on the side of the shell mound, which later found to belong to the Liangdao Man

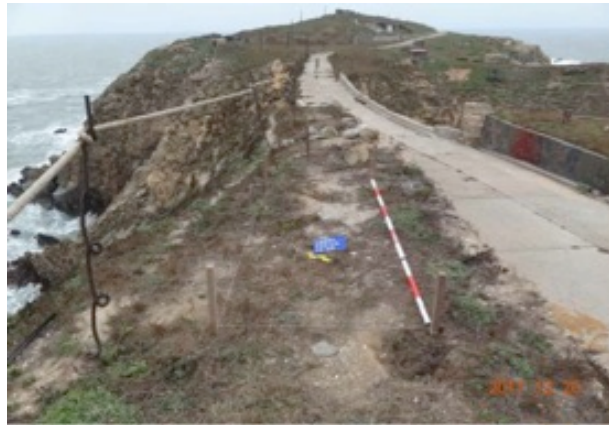

(b) LDDW-I site, the surface conditions prior to excavation, in the area within wooden poles; the road (right) is at a lower level

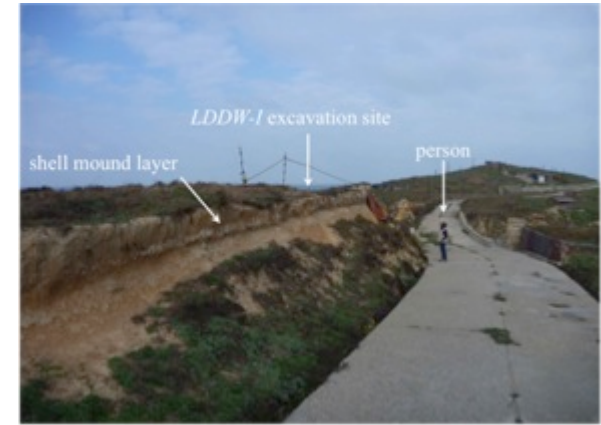

(c) View from the roadside

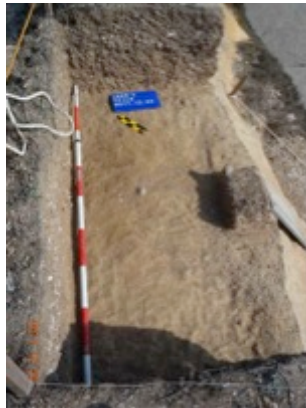

(d) LDDW-I site, the layer prior exposure of Liangdao Man, the side adjacent to the road has been exposed for access

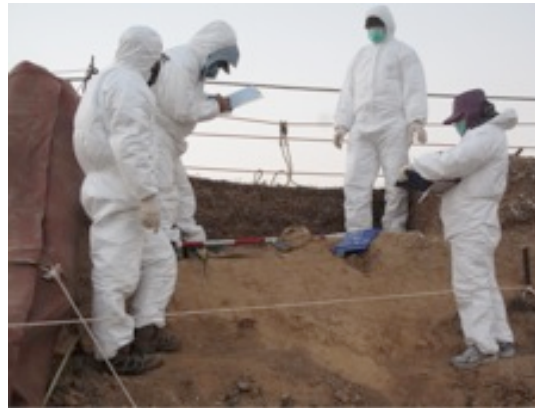

(e) LDDW-I site, team wore protective clothing during excavating the burial, to minimize external contamination

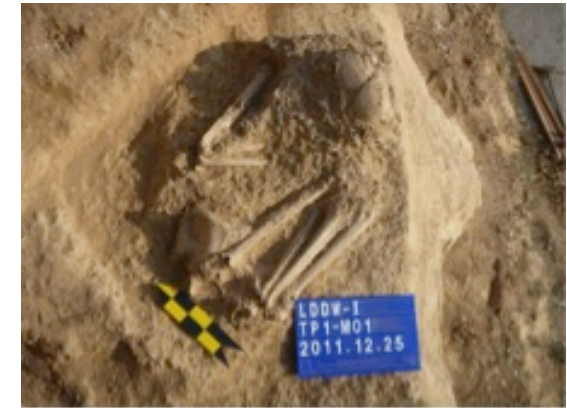

(f) LDDW-I site, the burial *in situ*

### Figure S3. The C14-AMS dating report of the Liangdao Man

A thoracic rib was sent in May 2012 to Beta Analytic INC., an ISO 17025-accredited radiocarbon-dating lab in Florida, USA. The C14-AMS date of the Liangdao Man is 8060-8320 Cal BP (at 95% probability).

| Sample Data                                                                                                                                                                                                                                                               | Measured Radiocarbon Age | 13C/12C Ratio | Conventional Radiocarbon Age(*) |
|---------------------------------------------------------------------------------------------------------------------------------------------------------------------------------------------------------------------------------------------------------------------------|--------------------------|---------------|---------------------------------|
| Beta - 321640<br>SAMPLE : LDDW-I-P1 M01<br>ANALYSIS : AMS-PRIORITY delivery<br>MATERIAL/PRETREATMENT : (bone collagen): collagen extraction: with alkali<br>2 SIGMA CALIBRATION : Cal BC 6370 to 6210 (Cal BP 8320 to 8160) AND Cal BC 6140 to 6120 (Cal BP 8090 to 8060) | 7180 +/- 40 BP           | -13.0 o/oo    | 7380 +/- 40 BP                  |

### CALIBRATION OF RADIOCARBON AGE TO CALENDAR YEARS

(Variables: C13/C12=-13:lab.mult=1)

Laboratory number: **Beta-321640**

Conventional radiocarbon age: **7380±40 BP**

**2 Sigma calibrated results: Cal BC 6370 to 6210 (Cal BP 8320 to 8160) and Cal BC 6140 to 6120 (Cal BP 8090 to 8060)**  
(95 % probability)

Intercept data

Intercept of radiocarbon age with calibration curve: **Cal BC 6230 (Cal BP 8180)**

**1 Sigma calibrated results: Cal BC 6330 to 6320 (Cal BP 8280 to 8270) and Cal BC 6250 to 6220 (Cal BP 8200 to 8170)**  
(68 % probability)

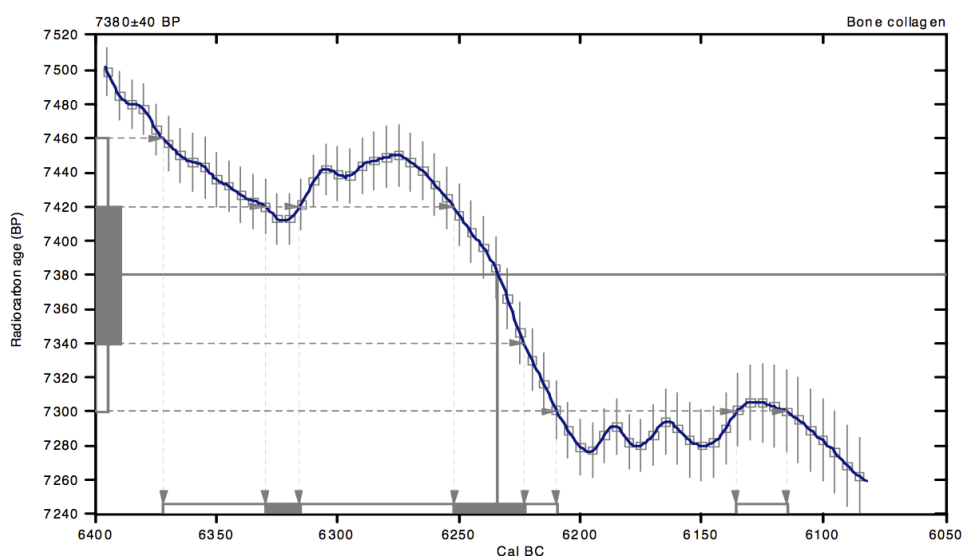

#### References:

*Database used*  
INTCAL09

*References to INTCAL09 database*

Heaton, et.al., 2009, Radiocarbon 51(4):1151-1164, Reimer, et.al., 2009, Radiocarbon 51(4):1111-1150, Stuiver, et.al., 1993, Radiocarbon 35(1):137-189, Oeschger, et.al., 1975, Tellus 27:168-192

*Mathematics used for calibration scenario*

A Simplified Approach to Calibrating C14 Dates  
Talma, A. S., Vogel, J. C., 1993, Radiocarbon 35(2):317-322

### Beta Analytic Radiocarbon Dating Laboratory

4985 S.W. 74th Court, Miami, Florida 33155 • Tel: (305)667-5167 • Fax: (305)663-0964 • E-Mail: beta@radiocarbon.com

**Figure S4. Length distribution and base composition in different fragment lengths**

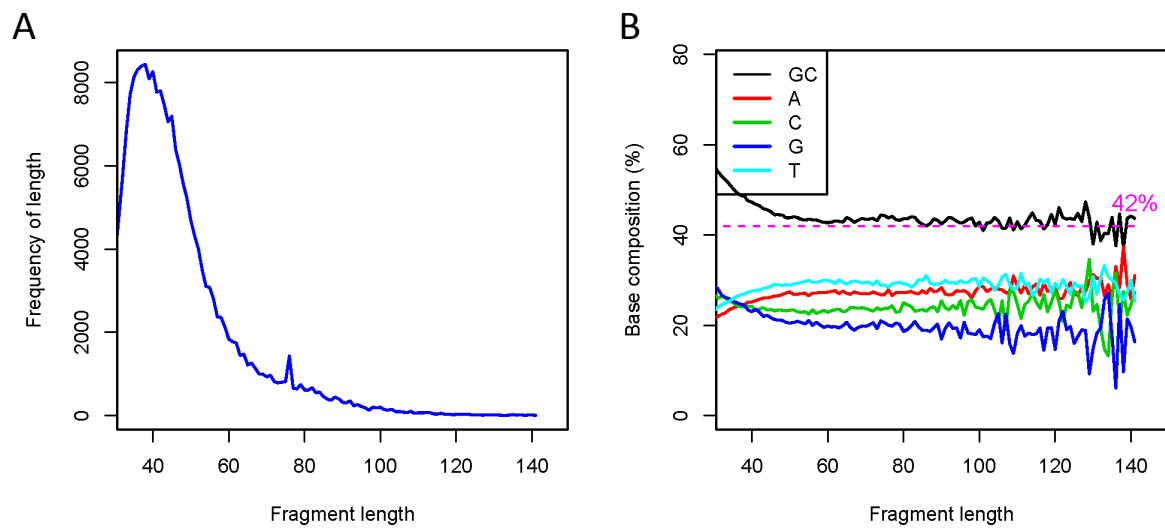

**Figure S5. Proportional support with the consensus and coverage along the mtDNA**

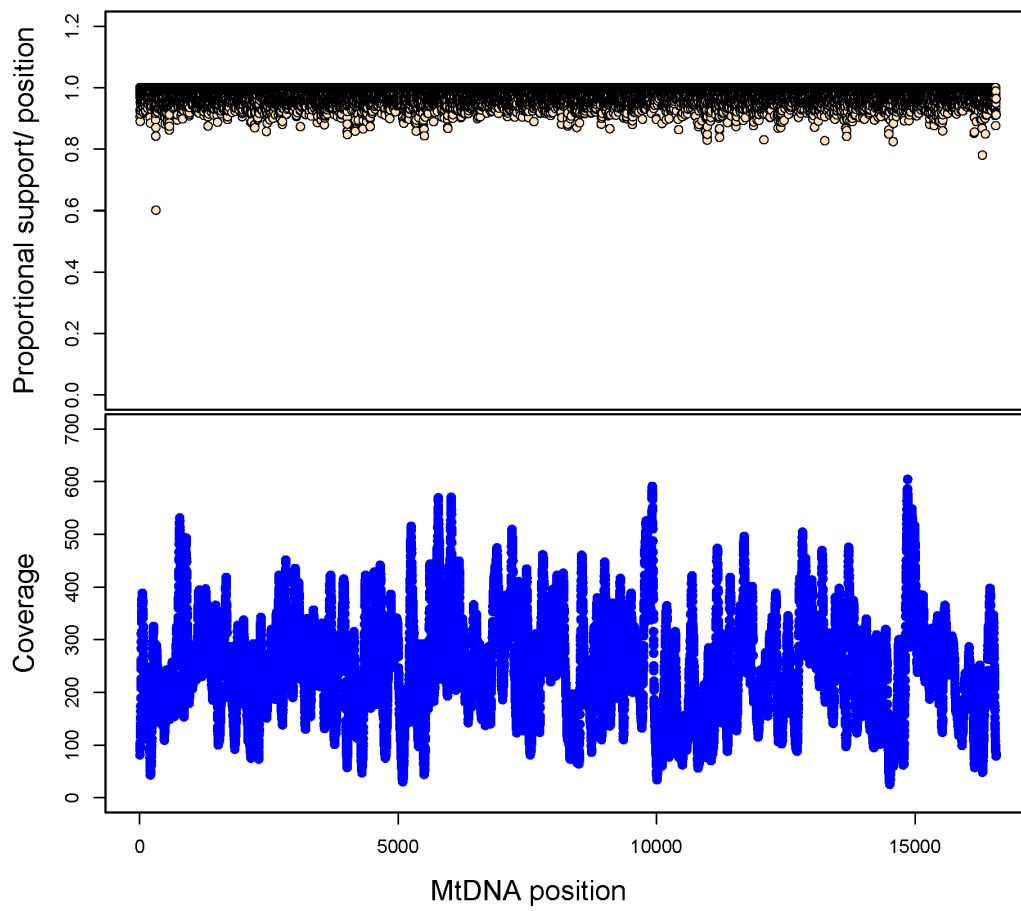

Figure S6. Damage pattern from the 5' end and 3' end of the fragment

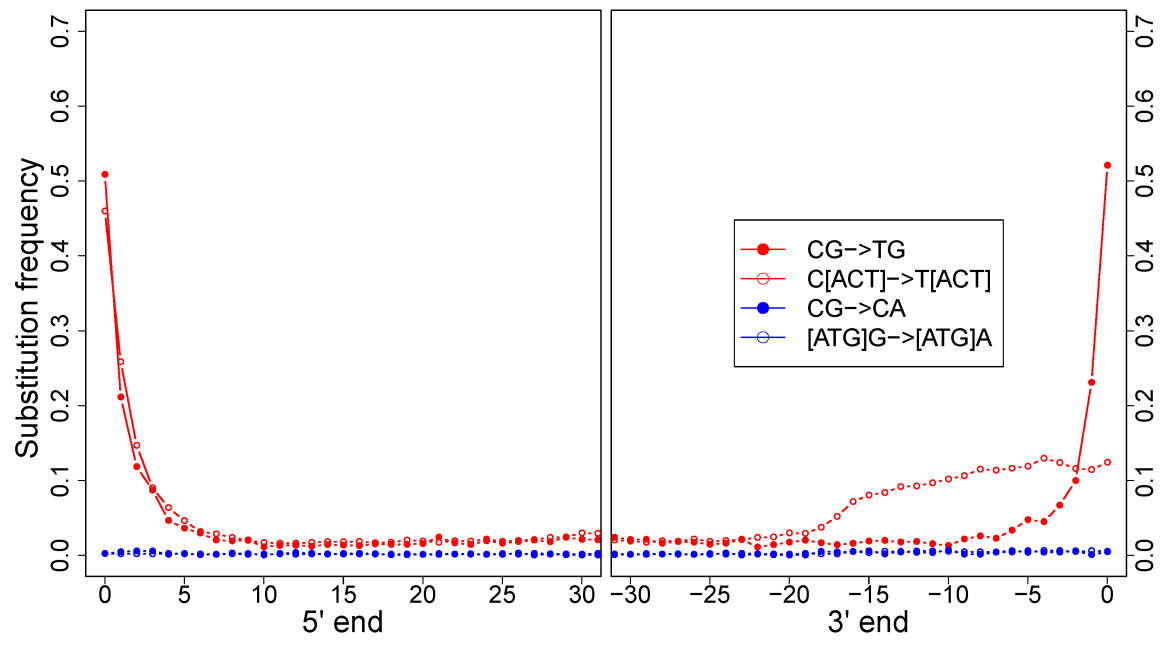

**Figure S7. Plot of sequencing coverage per sample of the 12 Taiwanese groups**

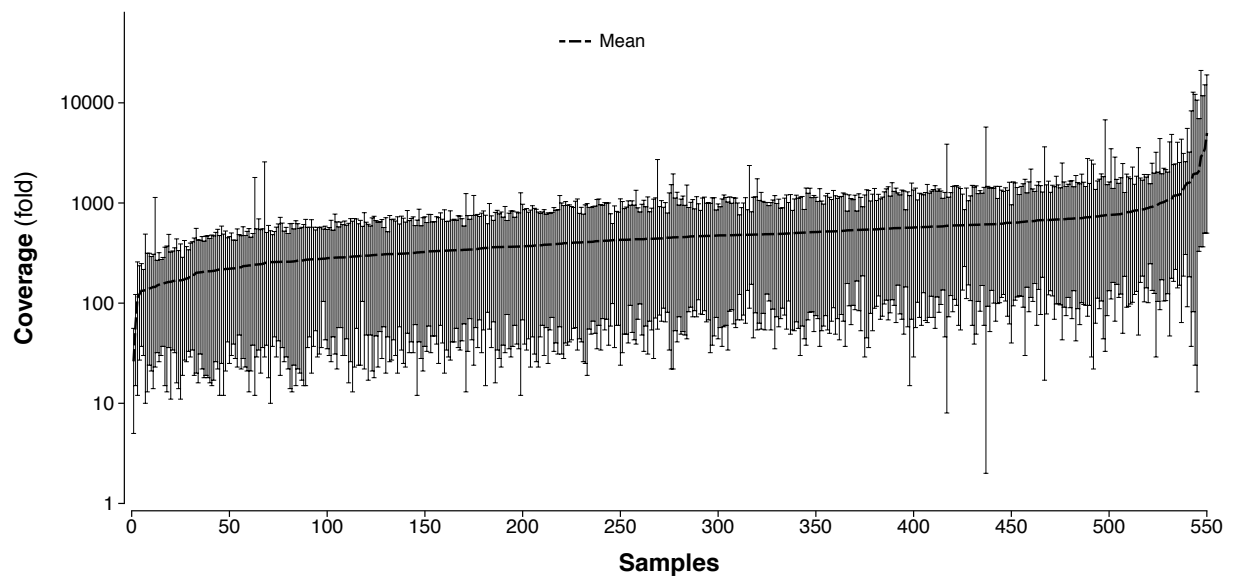



**Figure S8. Resampling of Formosan and Han groups to observe sample size effects**

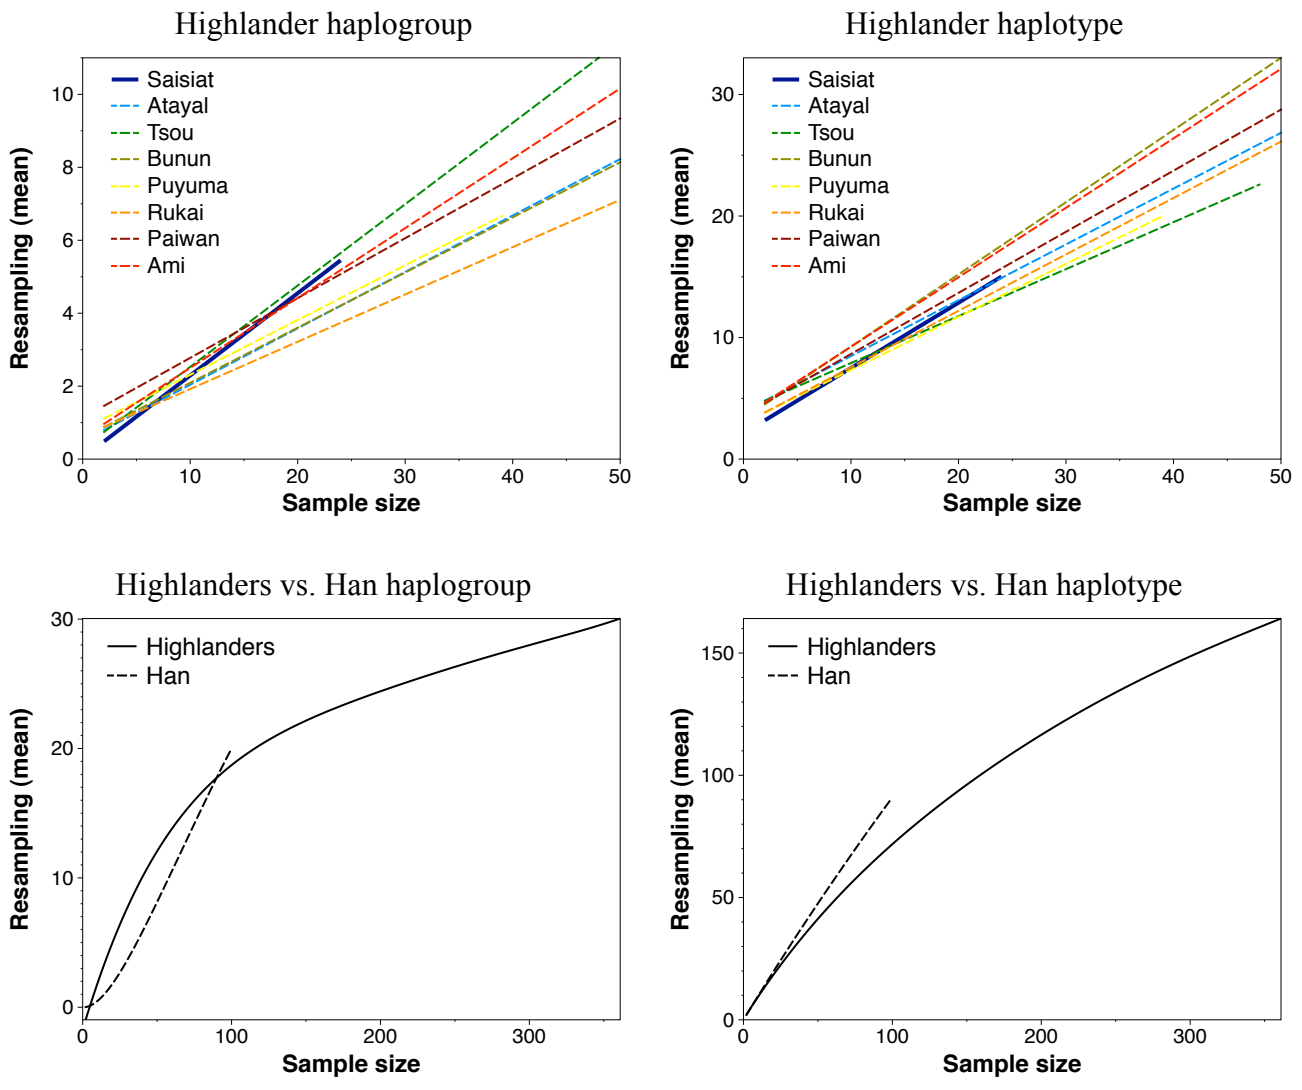

**Figure S9. Non-metric multidimensional scaling (NMDS) plots based on  $\Phi$ st distances**

(a)

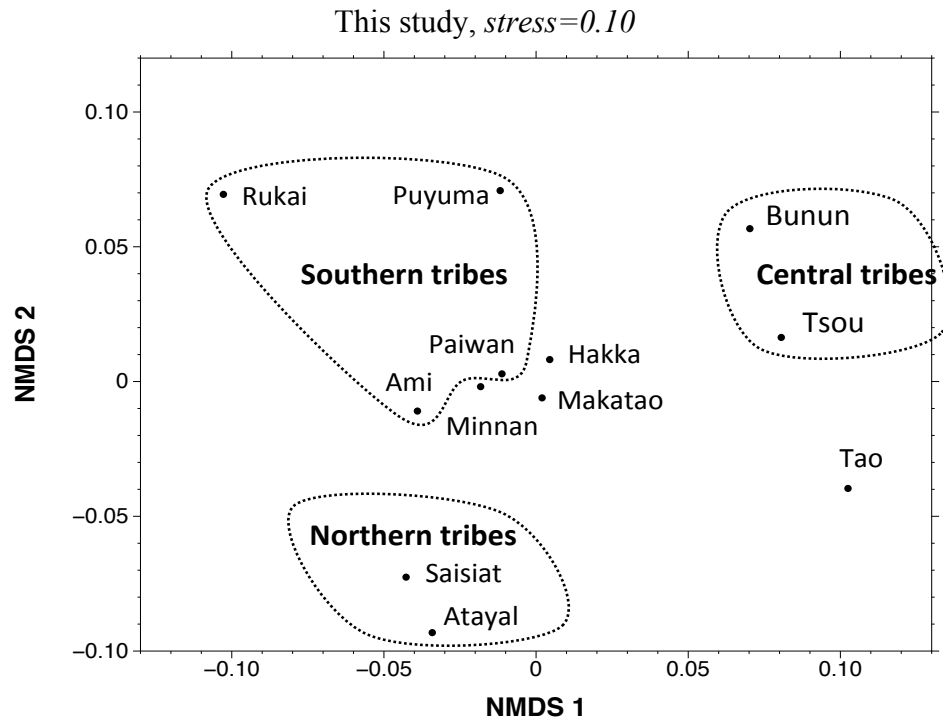

(b)

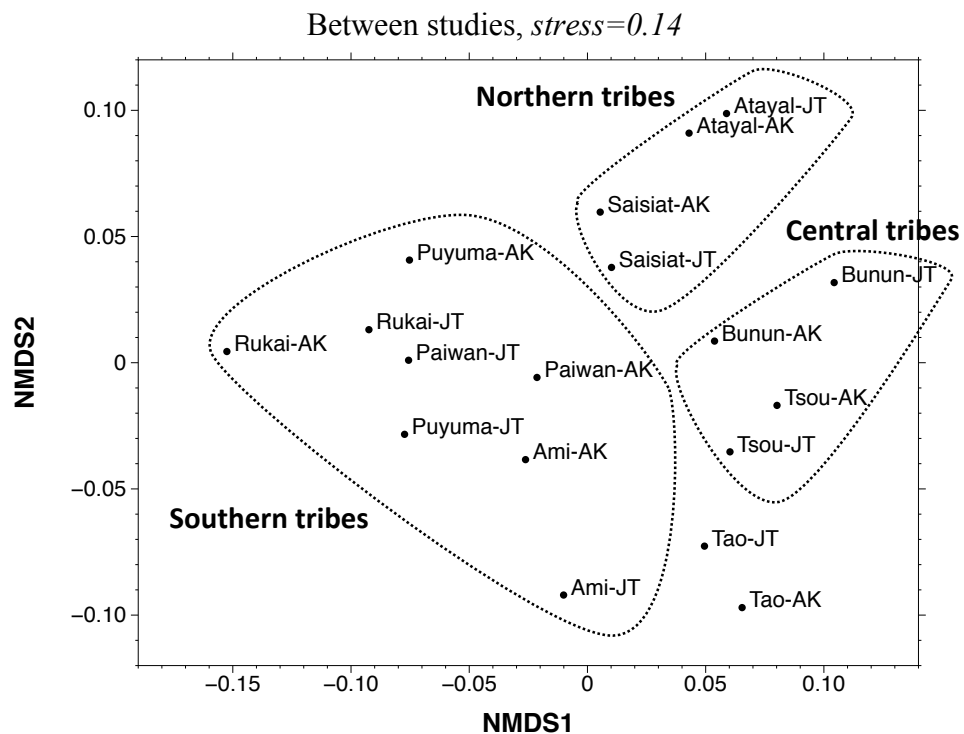

(a) The 12 Taiwanese groups; 550 complete mtDNA genomes (relevant groups circled), (b) Comparison of this study (suffix-AK) and Trejaut *et al.*<sup>1</sup> (suffix-JT) in a combined over 1000 Taiwanese aboriginal sequences, downsampled to 713 bp that include HVS-I and HVS-II.

**Figure S10. Haplogroup E calibrated to the Liangdao Man**

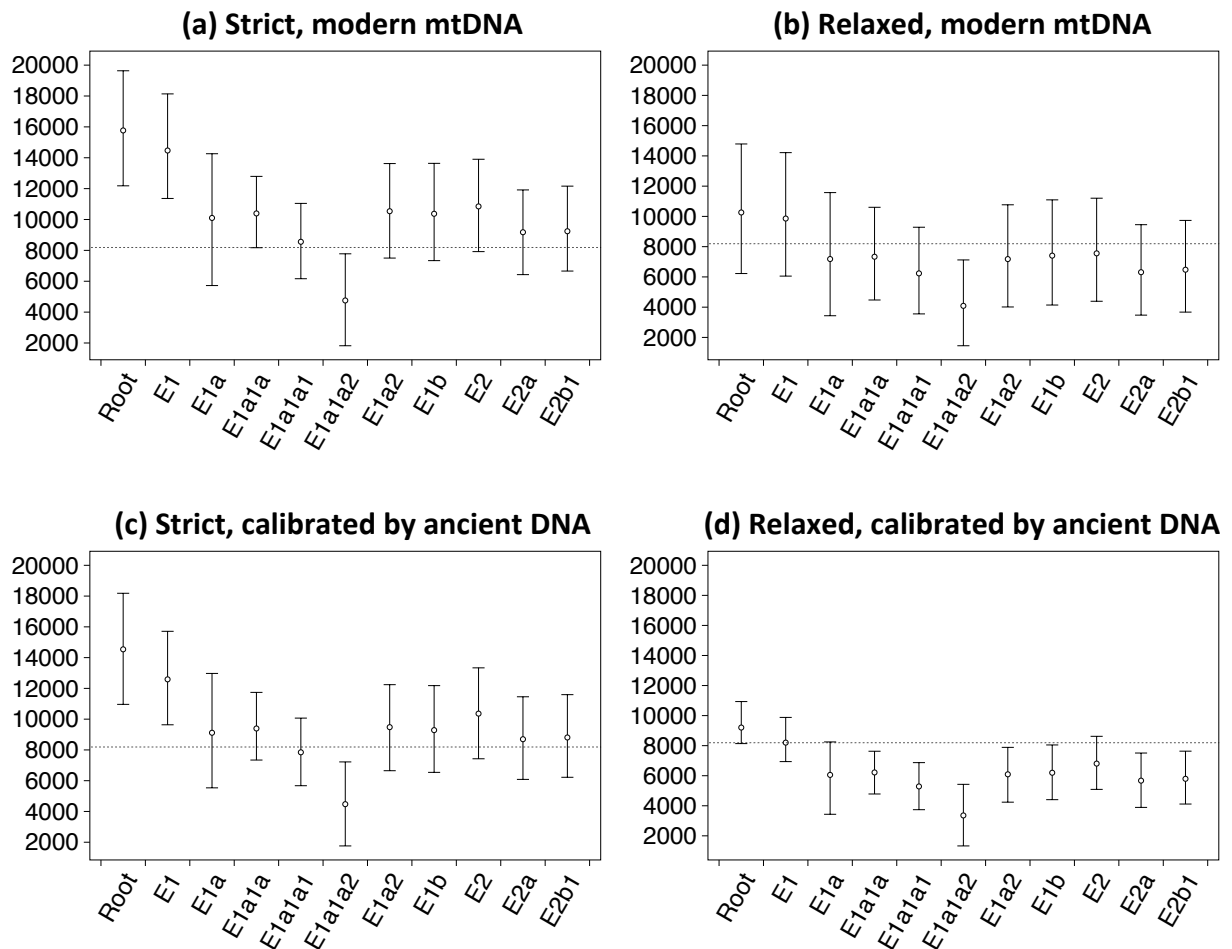

We compared 104 complete mtDNA haplogroup E sequences that are calibrated/uncalibrated to ancient DNA and under strict/relaxed clock methods. The calibrated relaxed clock (d) receives the best support, where many E lineages coalesce at a mean of about 6 ka. The exception is E1a1a2 that is so far observed in the south Formosans, thus reflecting expansion within Taiwan, and its coalescence time largely agrees with ‘Formosan phylogeny’ simulation of south to diversify 3376-1383 ya (Table S4). The mean (open circle); line is 95% HPD; horizontal dash is mean age of Liangdao Man (8190 ya); y-axis is years BP.

**Figure S11. Bayesian skyline plot of the calibrated haplogroup E**

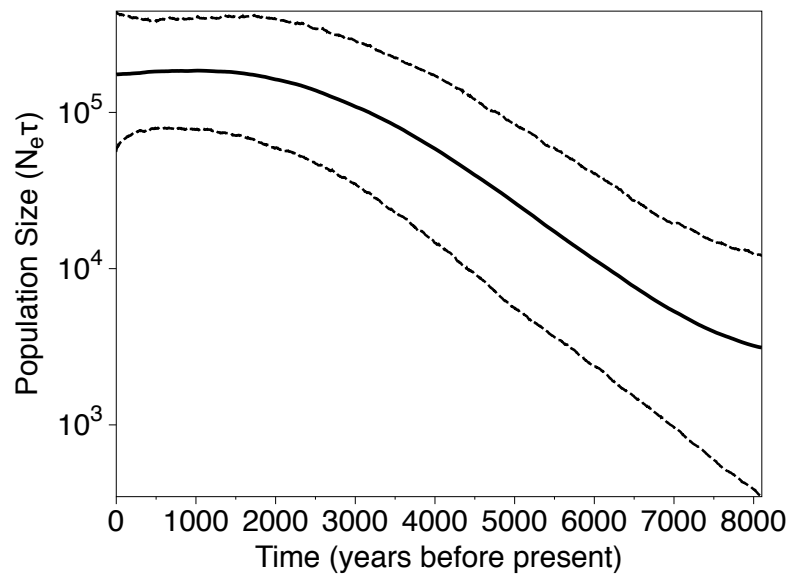

Population size is product of effective size ( $N_e$ ) and generation time ( $\tau$ , we assume 25 years/generation); solid line is mean; dash is 95% HPD.

**Figure S12. Highland Formosan mtDNA genomes calibrated to the Liangdao Man**

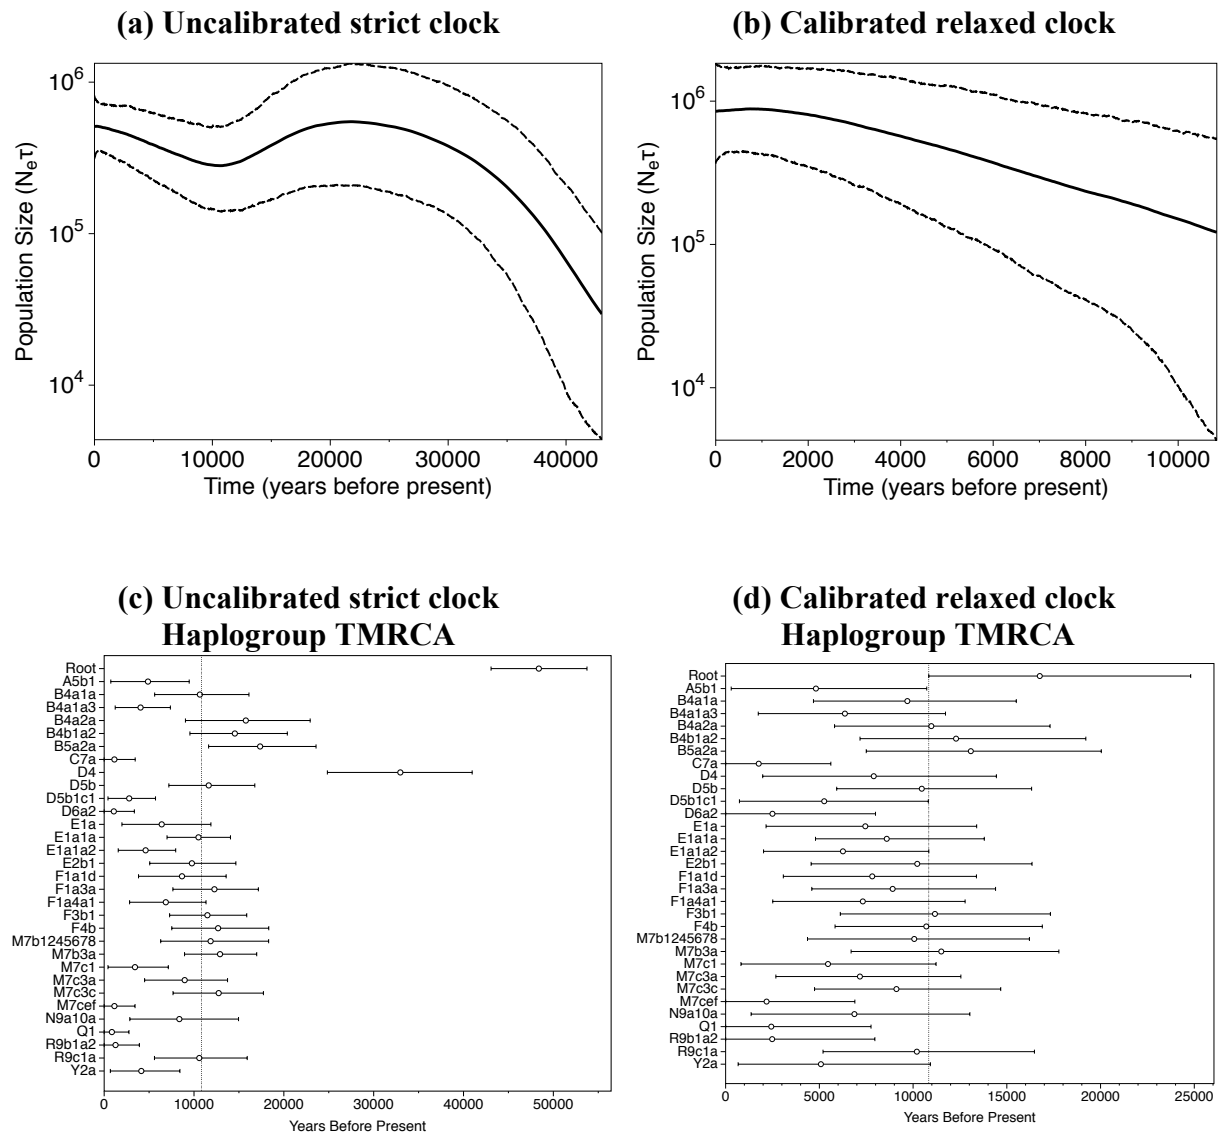

We compared 361 complete Formosan mtDNA sequences under uncalibrated/strict clock and calibrated/relaxed clock methods. The calibrated relaxed clock (b and d) receives the best support. **(a-b)** Bayesian skyline plot of population size changes over time; population size is product of effective size ( $N_e$ ) and generation time ( $\tau$ , we assume 25 years/generation); solid line is mean; dash is 95% HPD; **(c-d)** TMRCA of highland Formosan haplogroups; mean is open circle; line is 95% HPD; vertical dash is 10,835 ya is the start of population expansion from (b) and placed as a reference.

**Figure S13. Proposed model for simulation 1: Into/Out-of-Taiwan**

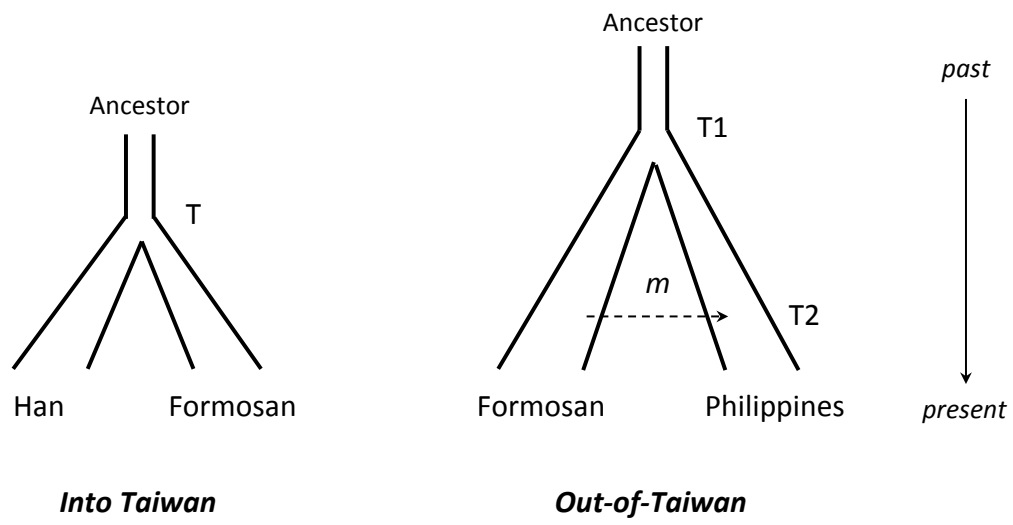

Figure S14. Determining the best shape for the Formosan phylogeny

(a)

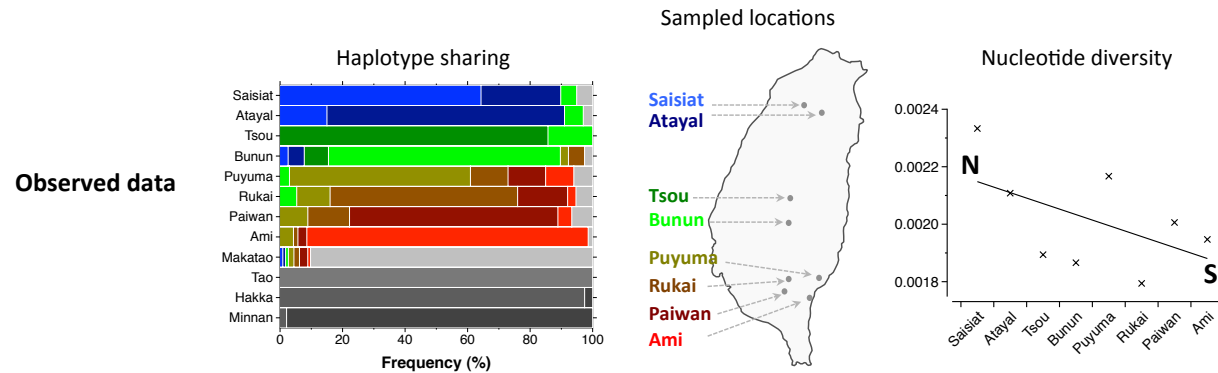

(b)

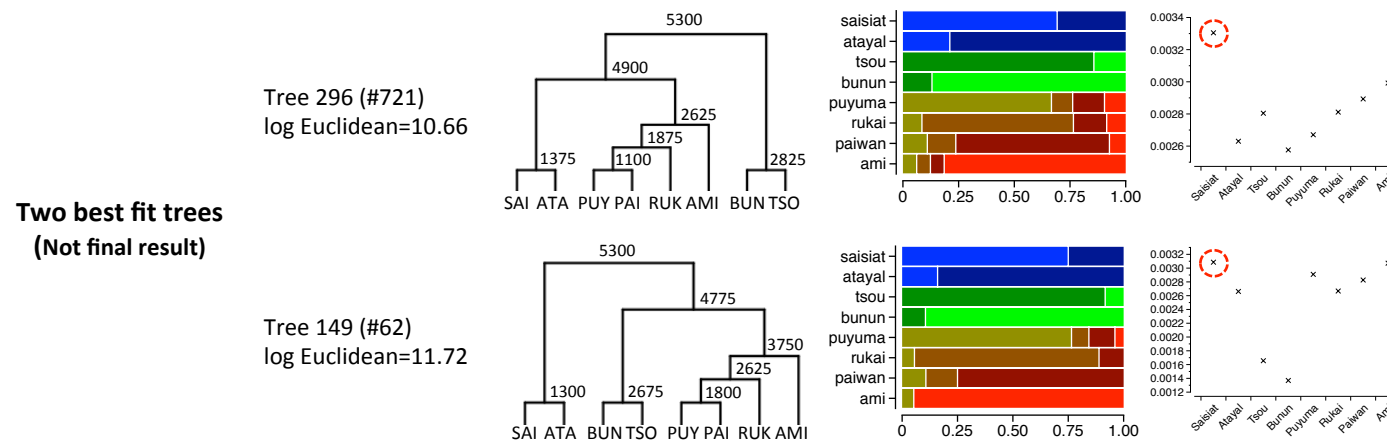

(a) Observed summary of 550 complete mtDNA sequences; each group is colored to sampled locations (center); color bars denote the frequency of haplotypes shared within the group and with other groups. (b) Two best fitting trees, the difference being whether central: tree 296 (#721) or north: tree 149 (#62), diverged first; *middle*, the branch order and divergence times (years BP) and shared haplotypes, *right*, nucleotide diversity, which we required the Saisiat tribe (red circle) to show the highest diversity, however fit is not perfect (log Euclidean distance, *left*).

**Figure S15. Improve fit to observed nucleotide diversity using the best shape tree 149(#62)**

*Top-to-bottom, simulations increasingly distant from the observed*

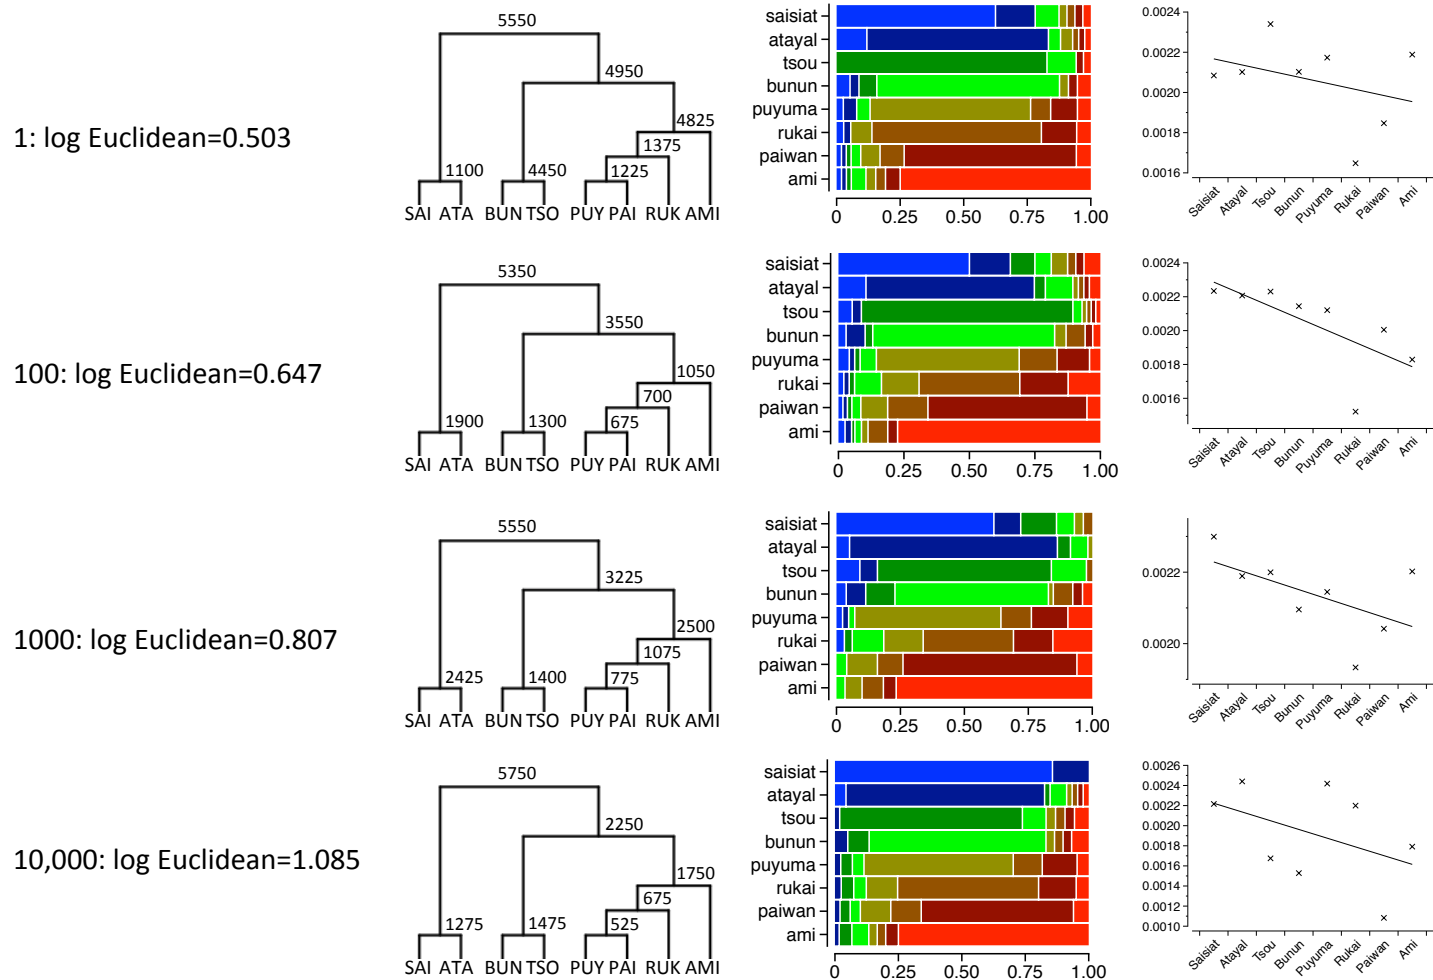



**Figure S16. Tree 149(#62) to represent the Formosan phylogeny and Bayesian posterior tree root heights of the four geographic groups**

**Best fit tree 149 (#62)**

(Dashes) Simulation 1: *Into Taiwan*

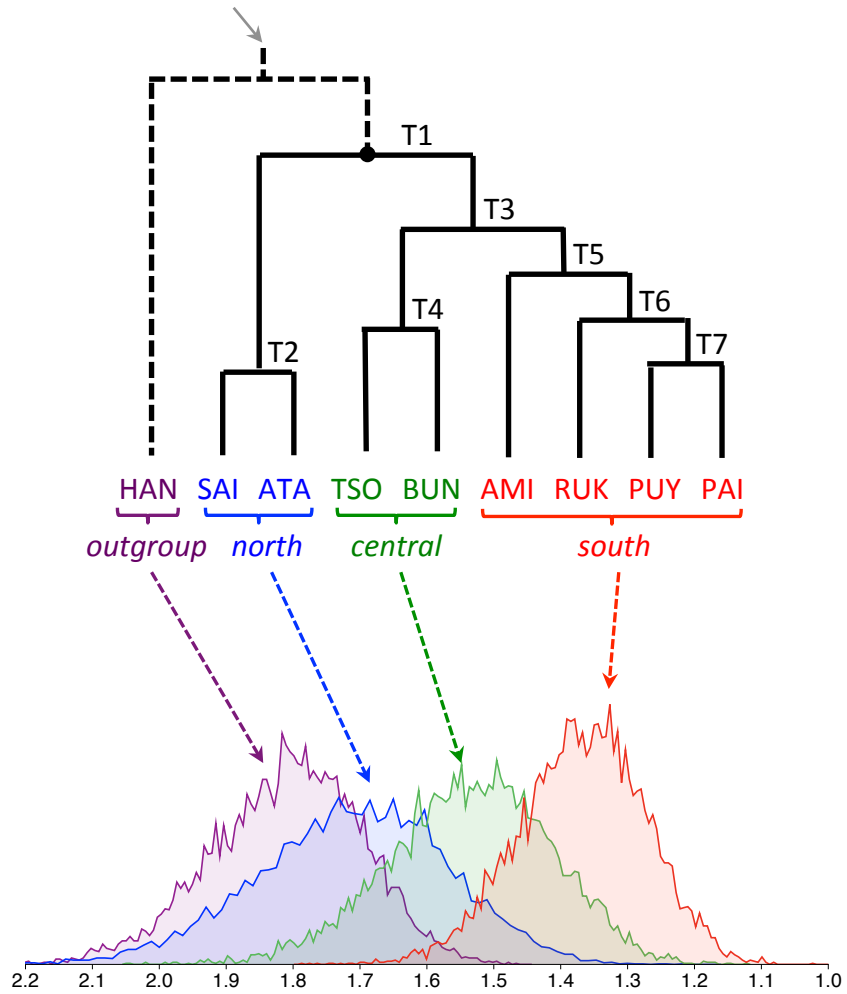

Southward groups show progressively younger coalescent ages (time is relative on the x-axis).

Figure S17. Posterior distribution (red) of the best tree 149 (#62) shows improved fit to the observed (black bar) than prior (blue)

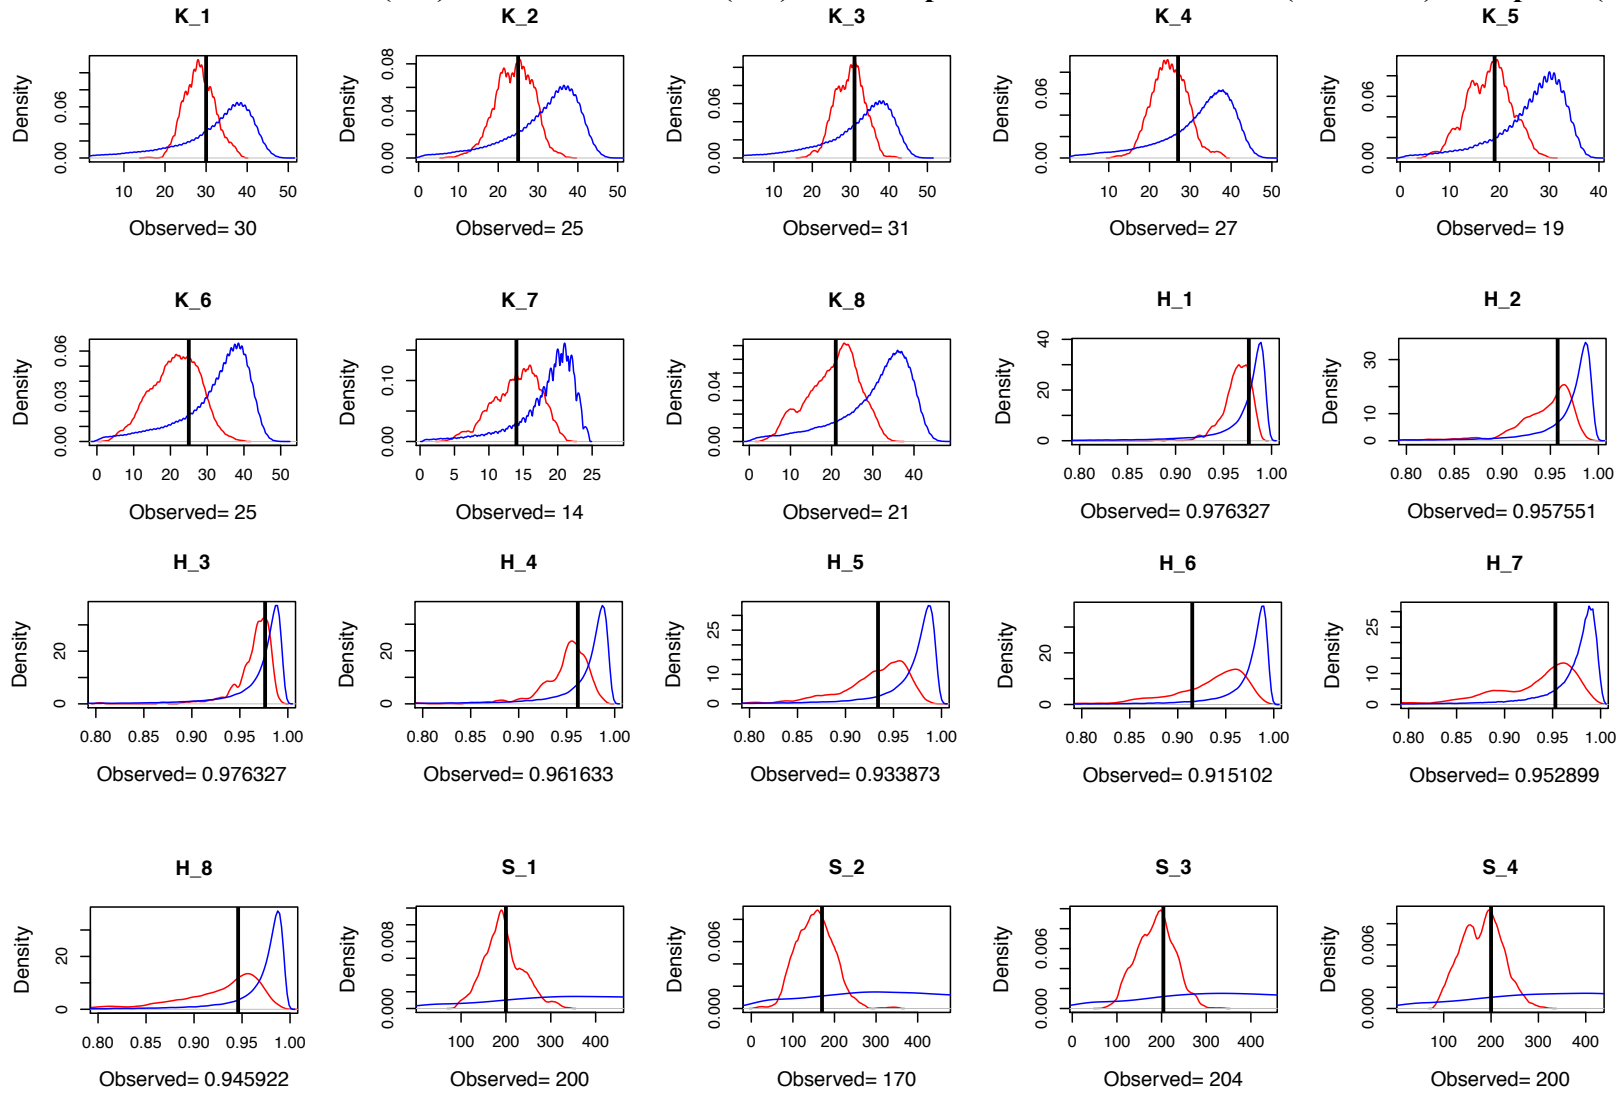

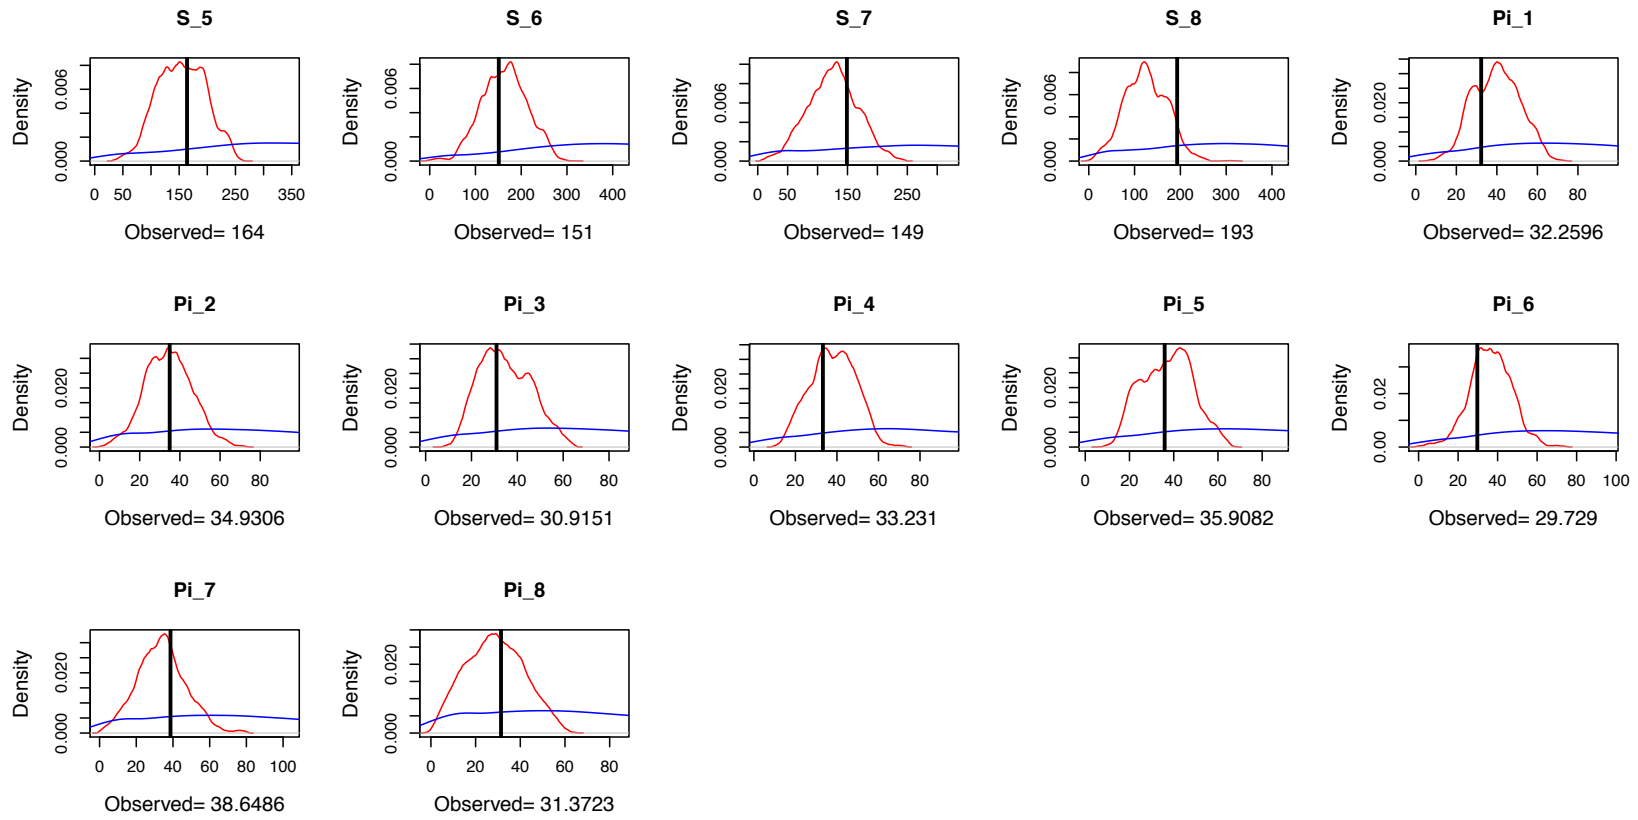

**Figure S18. Linguistic relationships used in this study**

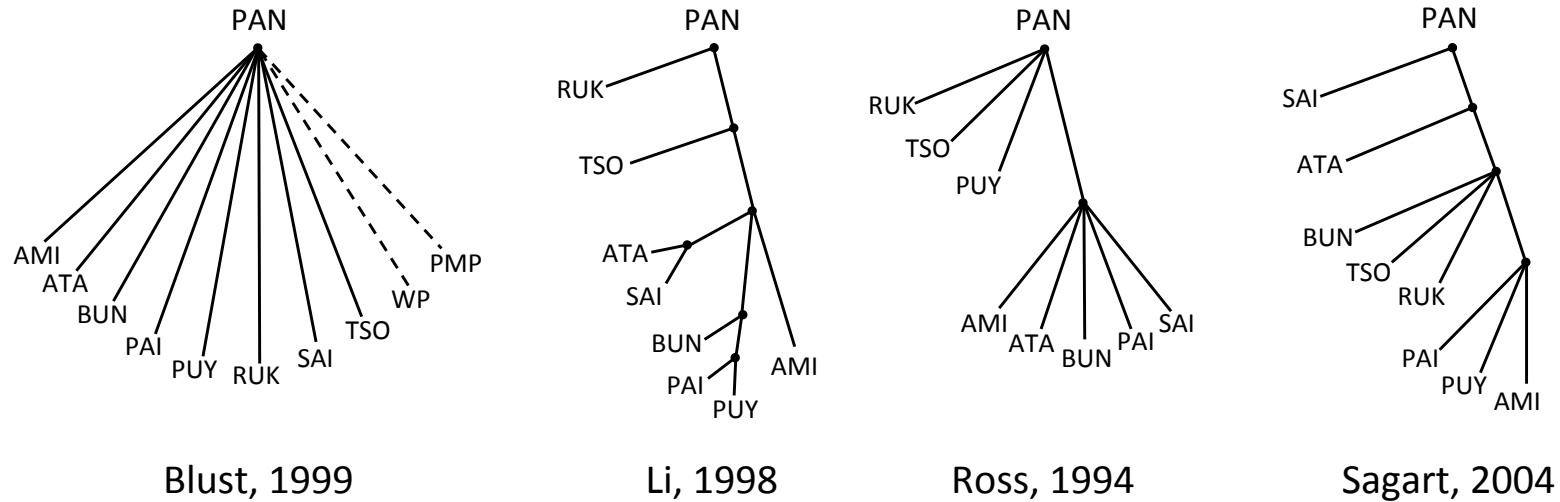

Blust's model<sup>2</sup> has ten branches descended from one common ancestor, here shown eight highlanders (solid lines) and groups not included (dashed lines) are the Western Plainsmen (WP) and Proto-Malayo-Polynesian (PMP); Li's model<sup>3</sup> has two early branches: Rukai and Tsou; Ross's model<sup>4</sup> has Rukai, Tsou and Puyuma as first branch and others under 'Nuclear Austronesian' (expanded for illustration); Sagart's model<sup>5</sup> is based on evolution of the Proto-Austronesian numeral system. Note: tribal placement deriving from a single point does not convey any order or geographic information; the root of each model is Proto-Austronesian (PAN).

**Figure S19. Mismatch distributions and Bayesian skyline plots of the 12 Taiwanese groups.** Highland Formosans are organized by descending latitude; *left*, mismatch distribution (frequency vs. pairwise differences); *right*, population size changes (effective size  $\times$  generation time; solid line is mean; dash is 95% HPD).

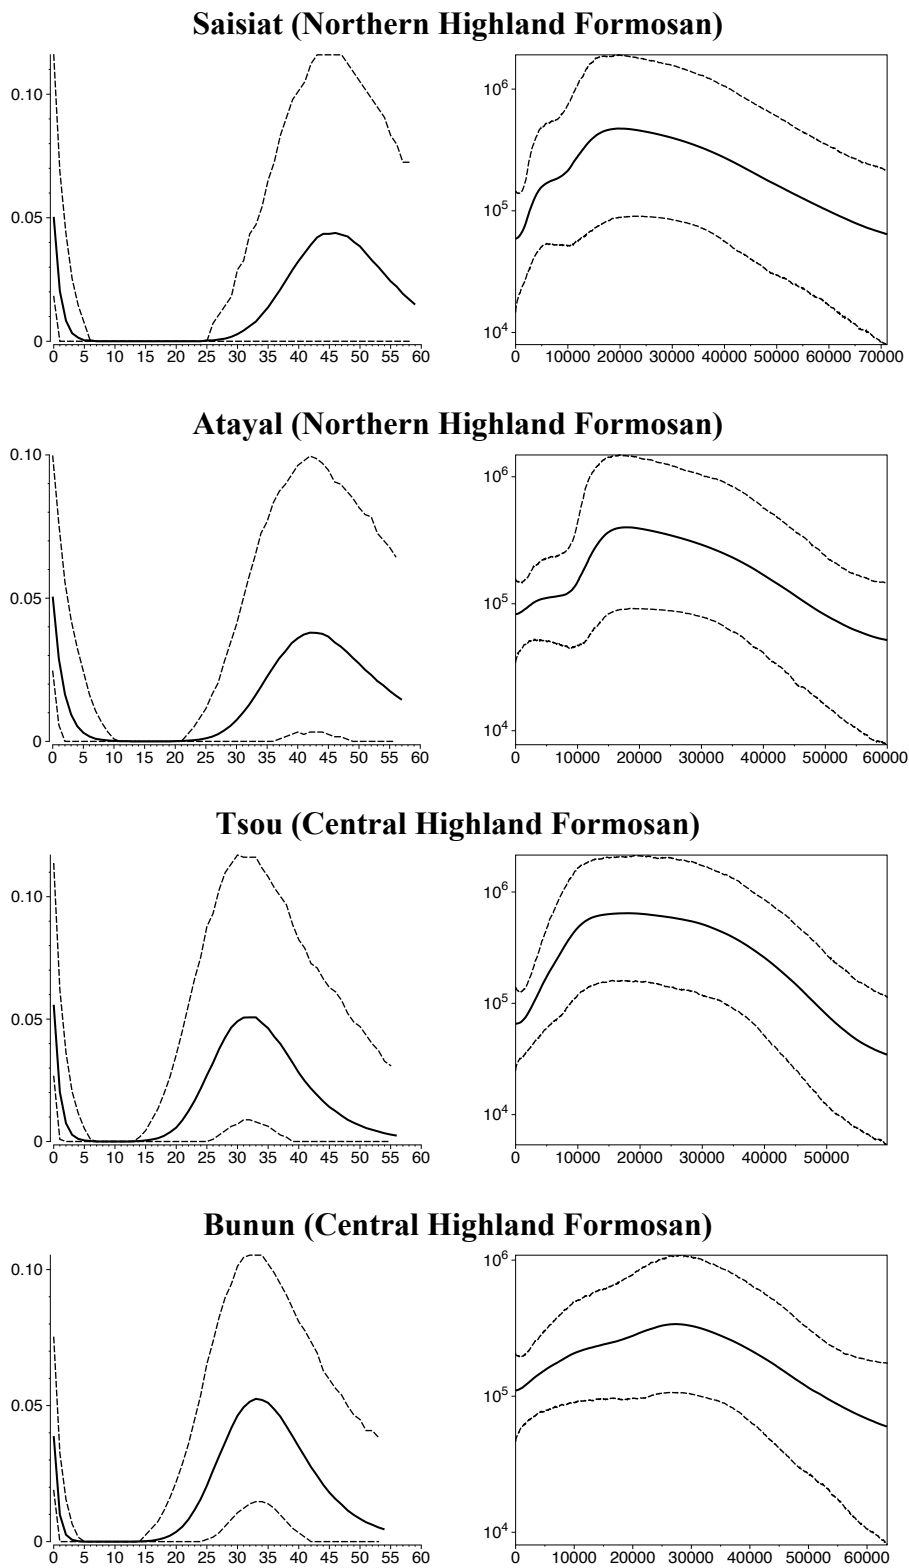

### Puyuma (Southern Highland Formosan)

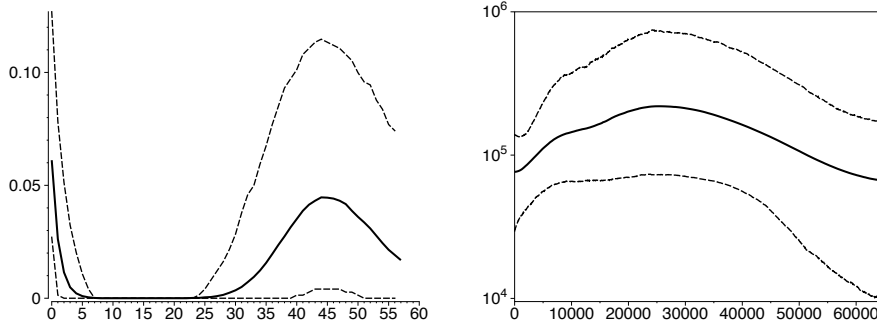

### Rukai (Southern Highland Formosan)

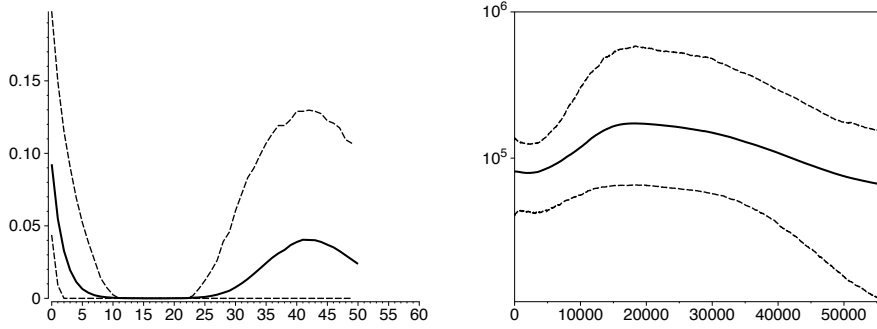

### Paiwan (Southern Highland Formosan)

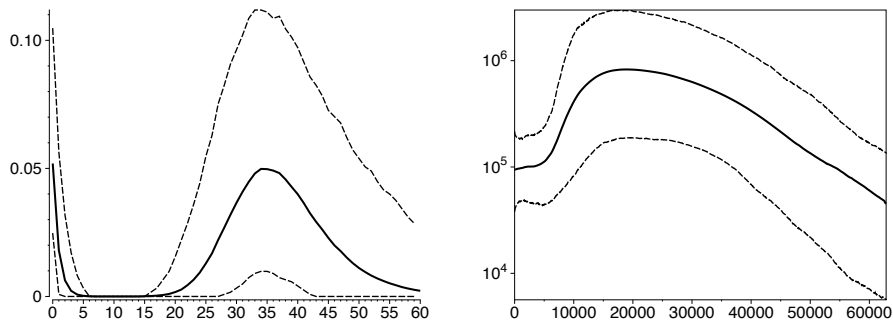

### Ami (Southern Highland Formosan)

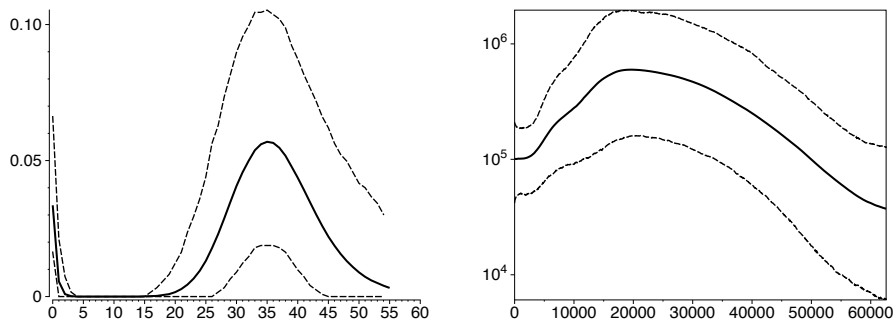

### Makatao (Lowland Formosan)

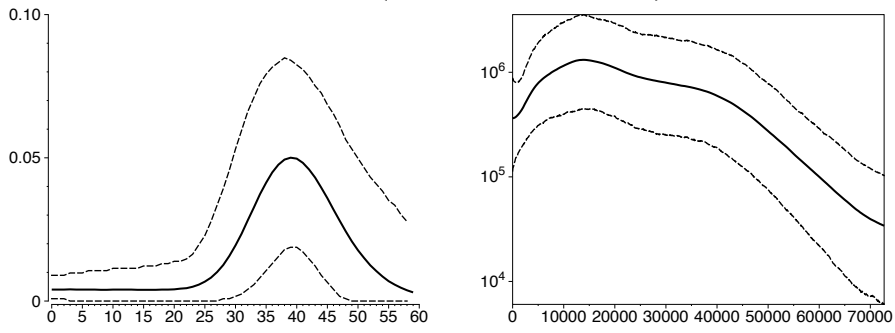

### Tao (Taiwanese group)

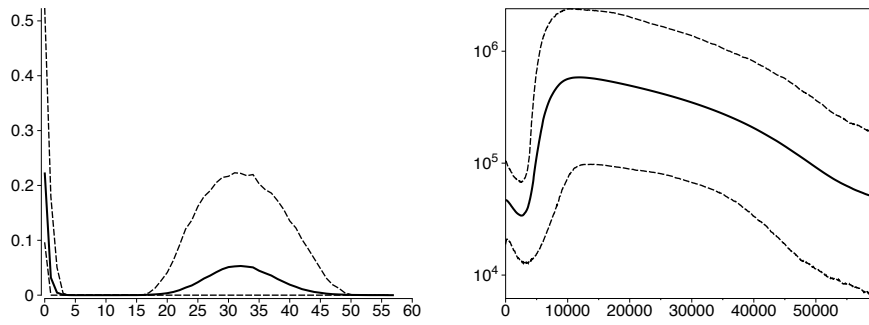

### Hakka (Taiwanese group)

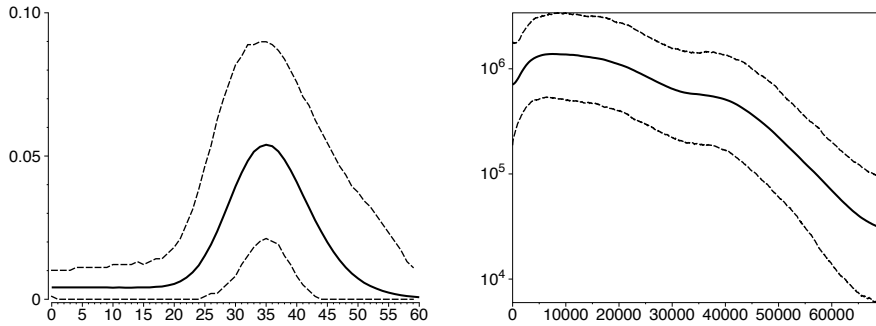

### Minnan (Taiwanese group)

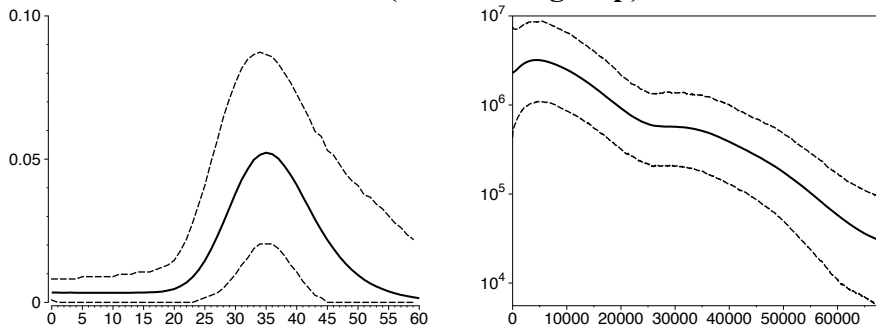

**Table S1. Demographic information of the 12 Taiwanese groups**

| Linguistic affiliation | Group   | Code | Sampling coordinates |           |          |           |
|------------------------|---------|------|----------------------|-----------|----------|-----------|
|                        |         |      | County               | Township  | Latitude | Longitude |
| Formosan (highland) †  | Saisiat | SAI  | Miaoli               | Nanjhuang | 24°36'   | 121°0'    |
|                        | Atayal  | ATA  | Hsinchu              | Jianshih  | 24°35'   | 121°17'   |
|                        | Tsou    | TSO  | Chiayi               | Alishan   | 23°27'   | 120°44'   |
|                        | Bunun   | BUN  | Kaohsiung            | Sanmin    | 23°13'   | 120°41'   |
|                        | Puyuma  | PUY  | Taitung              | Beinan    | 22°46'   | 121°5'    |
|                        | Rukai   | RUK  | Pingtung             | Wutai     | 22°44'   | 120°43'   |
|                        | Paiwan  | PAI  | Pingtung             | Majia     | 22°40'   | 120°41'   |
|                        | Ami     | AMI  | Taitung              | Taimali   | 22°32'   | 120°57'   |
| Formosan (lowland)     | Makatao | MAK  | Pingtung             | Wanluan   | 22°35'   | 120°36'   |
| Malayo-Polynesian      | Tao     | TAO  | Taitung              | Lanyu     | 22°1'    | 121°33'   |
| Sinitic                | Hakka   | HAK  | Pingtung             | Neipu     | 22°40'   | 120°35'   |
|                        | Minnan  | MIN  | Kaohsiung            |           | 22°37'   | 120°18'   |

†highland Formosan tribes ordered by decreasing latitude



**Table S2. Parameter estimates of the Into/Out-of-Taiwan**

| Parameters           | Prior                                         | Distribution | Mean                  | Mode                  | 95% HPD               |                       | Pseudo-observed |       |      |          |          |  |
|----------------------|-----------------------------------------------|--------------|-----------------------|-----------------------|-----------------------|-----------------------|-----------------|-------|------|----------|----------|--|
|                      |                                               |              |                       |                       |                       |                       | R <sup>2</sup>  | Bias  | RMSE | Coverage | Factor 2 |  |
| <i>Into Taiwan</i>   |                                               |              |                       |                       |                       |                       |                 |       |      |          |          |  |
| T                    | 1 - 12,000                                    | Uniform      | 9491                  | 10,066                | 8093                  | 10,306                | 0.96            | 0.03  | 0.13 | 91       | 1        |  |
| Han                  | 1 - 330,000                                   | Uniform      | 19,075                | 19,555                | 17,902                | 20,060                | 0.92            | 0.01  | 0.03 | 85       | 1        |  |
| Formosan             | 1 - 80,000                                    | Uniform      | 4401                  | 4128                  | 3276                  | 5544                  | 0.98            | 0.05  | 0.11 | 82       | 1        |  |
| Ancestor             | 1 - 330,000                                   | Uniform      | 2358                  | 2464                  | 2125                  | 2538                  | 0.92            | 0.08  | 0.18 | 70       | 0.99     |  |
| $\mu$                | $2.16 \times 10^{-8}$ - $3.16 \times 10^{-8}$ | Uniform      | $3.07 \times 10^{-8}$ | $3.11 \times 10^{-8}$ | $2.98 \times 10^{-8}$ | $3.12 \times 10^{-8}$ | 0.99            | -0.02 | 0.06 | 95       | 1        |  |
| <i>Out-of-Taiwan</i> |                                               |              |                       |                       |                       |                       |                 |       |      |          |          |  |
| T1                   | 6000 - 30,000                                 | Uniform      | 23,595                | 28,489                | 13,725                | 29,601                | 0.75            | 0.05  | 0.27 | 91       | 0.98     |  |
| T2                   | 1 - 6000                                      | Uniform      | 4138                  | 4286                  | 3825                  | 4450                  | 0.81            | 0.02  | 0.05 | 70       | 1        |  |
| Formosan             | 1 - 80,000                                    | Uniform      | 6015                  | 6317                  | 5129                  | 6888                  | 0.93            | 0.02  | 0.09 | 91       | 1        |  |
| Philippines          | 1 - 160,000                                   | Uniform      | 4337                  | 4814                  | 3368                  | 4951                  | 0.91            | 0.05  | 0.11 | 84       | 1        |  |
| Ancestor             | 1 - 160,000                                   | Uniform      | 1283                  | 1785                  | 481                   | 2021                  | 0.95            | 0.3   | 0.36 | 63       | 0.93     |  |
| m                    | 0 - 1                                         | Uniform      | 0.0473                | 0.0154                | 0.0121                | 0.093                 | 0.56            | 0.15  | 1.02 | 75       | 0.53     |  |
| $\mu$                | $2.16 \times 10^{-8}$ - $3.16 \times 10^{-8}$ | Uniform      | $2.90 \times 10^{-8}$ | $3.10 \times 10^{-8}$ | $2.50 \times 10^{-8}$ | $3.14 \times 10^{-8}$ | 0.87            | 0.02  | 0.06 | 74       | 1        |  |

Parameters in this table refers to Figure S13

T, divergence time between Han and Formosan, in years before present

T1, divergence time between the ancestors of Formosan and indigenous of Philippines, in years before present

T2, migration time of the Formosan into northern Philippines, in years before present

Han, Formosan, and Philippines are present-day effective sizes

Ancestor, effective size of ancestral population from which the two populations diverged

m, migration rate per generation

$\mu$ , whole mtDNA substitution rate per site per year

**Table S3. Improved fit of the posterior to observed than prior****(a) Into Taiwan**

| Statistics | Observed | Prior |       | Posterior |       |
|------------|----------|-------|-------|-----------|-------|
|            |          | Bias  | RMSE  | Bias      | RMSE  |
| K_1        | 86       | 0.07  | 0.1   | 0.01      | 0.02  |
| K_2        | 164      | 0.7   | 0.79  | 0.09      | 0.1   |
| H_1        | 0.998    | 0     | 0.02  | 0         | 0     |
| H_2        | 0.991    | 0.01  | 0.02  | 0         | 0     |
| S_1        | 584      | 0.13  | 0.3   | -0.31     | 0.31  |
| S_2        | 512      | 0.41  | 0.47  | -0.22     | 0.22  |
| D_1        | -2.34    | -1.44 | -1.63 | -0.3      | -0.32 |
| D_2        | -1.63    | -1.97 | -2.4  | -0.3      | -0.36 |
| Pi_1       | 35.7     | 4.05  | 4.87  | 0.14      | 0.25  |
| Pi_2       | 37.3     | 3.69  | 4.49  | 0.04      | 0.21  |
| Φst        | 0.0228   | -0.03 | 2.69  | 0.07      | 0.41  |
| Va         | 2.28     | -0.03 | 2.69  | 0.07      | 0.41  |
| Vb         | 97.7     | 0     | 0.06  | 0         | 0.01  |

**(b) Out-of-Taiwan**

| Statistics | Observed | Prior |       | Posterior |       |
|------------|----------|-------|-------|-----------|-------|
|            |          | Bias  | RMSE  | Bias      | RMSE  |
| K_1        | 164      | 0.72  | 0.8   | 0.06      | 0.08  |
| K_2        | 49       | 0.31  | 0.33  | 0.05      | 0.06  |
| H_1        | 0.991    | 0.01  | 0.03  | 0         | 0     |
| H_2        | 0.988    | 0.01  | 0.02  | 0         | 0     |
| S_1        | 513      | 0.02  | 0.19  | -0.25     | 0.26  |
| S_2        | 270      | 0.47  | 0.58  | -0.06     | 0.1   |
| D_1        | -1.63    | -0.63 | -0.96 | -0.31     | -0.34 |
| D_2        | -1.30    | -0.4  | -0.98 | -0.2      | -0.29 |
| Pi_1       | 37.3     | 0.8   | 1.28  | 0.01      | 0.11  |
| Pi_2       | 35.5     | 0.89  | 1.38  | 0.05      | 0.17  |
| Φst        | 0.0296   | -0.75 | 1.36  | -0.15     | 0.31  |
| Va         | 2.96     | -0.75 | 1.36  | -0.15     | 0.31  |
| Vb         | 97.0     | 0.02  | 0.04  | 0         | 0.01  |
| hs1_1      | 0.988    | 0     | 0.02  | 0         | 0     |
| hs1_2      | 0.0122   | -0.22 | 1.66  | -0.17     | 0.35  |
| hs2_1      | 0.0408   | 0.03  | 2     | -0.17     | 0.34  |
| hs2_2      | 0.959    | 0     | 0.09  | 0.01      | 0.01  |

Abbrev: haplotypes (K), haplotype diversity (H), polymorphic sites (S), Tajima's D (D), pairwise differences (Pi), pairwise  $\Phi_{bb}$ , %variation among groups (Va) and within populations (Vb), haplotype sharing (hs); 1 and 2 is Han/Formosan (a), and Formosan/Philippines (b), respectively.

**Table S4. Parameter estimates of the Formosan phylogeny – re-simulations of the best tree 149 (#62)**

| Parameters | Prior                                         | Distribution | Mean                  | Mode                 | 95% HPD              |                       | Pseudo-observed |       |      |          |          |
|------------|-----------------------------------------------|--------------|-----------------------|----------------------|----------------------|-----------------------|-----------------|-------|------|----------|----------|
|            |                                               |              |                       |                      |                      |                       | R <sup>2</sup>  | Bias  | RMSE | Coverage | Factor 2 |
| T1         | 1 - 6000                                      | Uniform      | 5386                  | 5243                 | 5035                 | 5814                  | 0.77            | 0.02  | 0.07 | 100      | 1        |
| T2         | 1 - 6000                                      | Uniform      | 1248                  | 1364                 | 485                  | 2050                  | 0.57            | 0.11  | 0.67 | 100      | 0.72     |
| T3         | 1 - 6000                                      | Uniform      | 4226                  | 4271                 | 4049                 | 4452                  | 0.66            | 0.05  | 0.16 | 100      | 0.99     |
| T4         | 1 - 6000                                      | Uniform      | 2281                  | 2437                 | 1807                 | 2654                  | 0.73            | 0.12  | 0.72 | 100      | 0.67     |
| T5         | 1 - 6000                                      | Uniform      | 3376                  | 3423                 | 3010                 | 3794                  | 0.68            | 0.02  | 0.32 | 97       | 0.96     |
| T6         | 1 - 6000                                      | Uniform      | 2266                  | 2355                 | 1600                 | 2687                  | 0.61            | 0.11  | 0.55 | 98       | 0.77     |
| T7         | 1 - 6000                                      | Uniform      | 1383                  | 1098                 | 668                  | 2624                  | 0.73            | -0.02 | 0.68 | 92       | 0.74     |
| AMI        | 1 - 10,000                                    | Uniform      | 1681                  | 1717                 | 1506                 | 1829                  | 0.67            | 0.08  | 0.21 | 100      | 1        |
| ATA        | 1 - 10,000                                    | Uniform      | 1168                  | 1068                 | 844                  | 1911                  | 0.86            | 0.11  | 0.52 | 100      | 0.89     |
| BUN        | 1 - 10,000                                    | Uniform      | 1902                  | 1898                 | 1871                 | 1937                  | 0.84            | -0.02 | 0.05 | 100      | 1        |
| PAI        | 1 - 10,000                                    | Uniform      | 1356                  | 1454                 | 957                  | 1796                  | 0.77            | 0.07  | 0.35 | 90       | 0.96     |
| PUY        | 1 - 10,000                                    | Uniform      | 770                   | 798                  | 557                  | 981                   | 0.75            | 0.15  | 0.4  | 99       | 0.89     |
| RUK        | 1 - 10,000                                    | Uniform      | 803                   | 540                  | 367                  | 1419                  | 0.86            | 0.14  | 0.74 | 95       | 0.87     |
| SAI        | 1 - 10,000                                    | Uniform      | 1058                  | 1017                 | 676                  | 1258                  | 0.51            | 0.14  | 0.56 | 99       | 0.9      |
| TSO        | 1 - 10,000                                    | Uniform      | 1277                  | 1511                 | 351                  | 1823                  | 0.89            | 0.19  | 0.38 | 95       | 0.91     |
| m          | 0 - 0.05                                      | Uniform      | 0.00898               | 0.0103               | 0.00519              | 0.0124                | 0.38            | 0.48  | 0.63 | 95       | 0.78     |
| μ          | 2.16×10 <sup>-8</sup> - 3.16×10 <sup>-8</sup> | Uniform      | 2.46×10 <sup>-8</sup> | 2.4×10 <sup>-8</sup> | 2.3×10 <sup>-8</sup> | 2.72×10 <sup>-8</sup> | 0.79            | -0.01 | 0.11 | 92       | 1        |

Parameters in this table refers to Figure S16

T1-T7, in years before present

AMI-TSO, are present-day effective sizes

m, is 'stepping-stone' migration rate between tribes per generation

μ, whole mtDNA substitution rate per site per year

**Table S5. Posterior of the best tree 149 (#62) shows improved fit to observed than prior**

| Statistics | Observed | Prior |      | Posterior |      |
|------------|----------|-------|------|-----------|------|
|            |          | Bias  | RMSE | Bias      | RMSE |
| K_1        | 30       | 0.08  | 0.32 | 0.01      | 0.05 |
| K_2        | 25       | 0.26  | 0.44 | 0.01      | 0.07 |
| K_3        | 31       | 0.03  | 0.3  | 0.02      | 0.05 |
| K_4        | 27       | 0.18  | 0.38 | 0         | 0.07 |
| K_5        | 19       | 0.39  | 0.53 | -0.03     | 0.12 |
| K_6        | 25       | 0.3   | 0.47 | -0.14     | 0.18 |
| K_7        | 14       | 0.31  | 0.44 | 0.07      | 0.12 |
| K_8        | 21       | 0.47  | 0.63 | 0.1       | 0.16 |
| H_1        | 0.976    | -0.02 | 0.1  | 0         | 0.01 |
| H_2        | 0.958    | 0     | 0.1  | 0         | 0.01 |
| H_3        | 0.976    | -0.02 | 0.09 | 0         | 0    |
| H_4        | 0.962    | -0.01 | 0.09 | 0         | 0.01 |
| H_5        | 0.934    | 0.02  | 0.1  | 0.01      | 0.01 |
| H_6        | 0.915    | 0.05  | 0.11 | 0.02      | 0.02 |
| H_7        | 0.953    | 0     | 0.1  | 0         | 0.01 |
| H_8        | 0.946    | 0.01  | 0.1  | 0         | 0.01 |
| S_1        | 200      | 1.63  | 2.35 | -0.04     | 0.12 |
| S_2        | 170      | 1.79  | 2.61 | -0.06     | 0.14 |
| S_3        | 204      | 1.42  | 2.13 | -0.05     | 0.12 |
| S_4        | 200      | 1.61  | 2.32 | -0.11     | 0.17 |
| S_5        | 164      | 2.02  | 2.83 | -0.06     | 0.16 |
| S_6        | 151      | 2.53  | 3.39 | 0         | 0.16 |
| S_7        | 149      | 1.78  | 2.69 | -0.08     | 0.17 |
| S_8        | 193      | 1.26  | 2.03 | -0.2      | 0.25 |
| Pi_1       | 32.3     | 2.76  | 4.09 | 0.12      | 0.22 |
| Pi_2       | 34.9     | 2.24  | 3.55 | -0.02     | 0.21 |
| Pi_3       | 30.9     | 2.67  | 4.08 | 0.14      | 0.26 |
| Pi_4       | 33.2     | 2.63  | 3.92 | 0.11      | 0.22 |
| Pi_5       | 35.9     | 2.36  | 3.58 | -0.02     | 0.15 |
| Pi_6       | 29.7     | 3.1   | 4.49 | 0.06      | 0.24 |
| Pi_7       | 38.6     | 1.97  | 3.22 | -0.07     | 0.19 |
| Pi_8       | 31.4     | 2.34  | 3.79 | 0.06      | 0.24 |

Abbrev: haplotypes (K), haplotype diversity (H), polymorphic positions (S), pairwise differences (Pi), the numbers 1-8 indicates tribal codes by alphabetical order, AMI-TSO, respectively. For example, K\_4 is number of haplotypes observed in the Paiwan and it is 27.

**Table S6. Summary statistics and mismatch analysis of the 12 Taiwanese groups**

|                    | n   | S   | h   | hd     | nd       | $\pi$ | Mismatch analysis           |            |            |                |                         |          |        |                |
|--------------------|-----|-----|-----|--------|----------|-------|-----------------------------|------------|------------|----------------|-------------------------|----------|--------|----------------|
|                    |     |     |     |        |          |       | Demographic expansion model |            |            |                | Spatial expansion model |          |        |                |
|                    |     |     |     |        |          |       | $\tau$                      | $\theta_0$ | $\theta_1$ | <i>P</i> (SSD) | $\tau$                  | $\theta$ | M      | <i>P</i> (SSD) |
| <b>Highlanders</b> |     |     |     |        |          |       |                             |            |            |                |                         |          |        |                |
| Saisiat            | 24  | 149 | 14  | 0.9529 | 0.002333 | 38.65 | 50.26                       | 0.48       | 134.65     | 0.04           | 43.75                   | 7.95     | 10.76  | <b>0.27</b>    |
| Atayal             | 50  | 170 | 25  | 0.9576 | 0.002108 | 34.93 | 45.54                       | 1.75       | 102.70     | 0.12           | 39.33                   | 11.26    | 7.49   | <b>0.42</b>    |
| Tsou               | 48  | 193 | 21  | 0.9459 | 0.001894 | 31.37 | 30.33                       | 5.65       | 174.02     | 0.01           | 29.43                   | 6.61     | 10.40  | <b>0.55</b>    |
| Bunun              | 50  | 204 | 31  | 0.9763 | 0.001866 | 30.92 | 33.32                       | 3.35       | 147.60     | 0.11           | 31.05                   | 6.52     | 18.06  | <b>0.45</b>    |
| Puyuma             | 39  | 164 | 19  | 0.9339 | 0.002167 | 35.91 | 49.42                       | 0.00       | 103.64     | 0.07           | 43.37                   | 6.98     | 8.25   | <b>0.46</b>    |
| Rukai              | 50  | 151 | 25  | 0.9151 | 0.001794 | 29.73 | 45.56                       | 0.00       | 113.32     | 0.00           | 40.31                   | 6.38     | 3.45   | <b>0.32</b>    |
| Paiwan             | 50  | 200 | 27  | 0.9616 | 0.002006 | 33.23 | 35.32                       | 3.54       | 159.65     | 0.03           | 32.80                   | 6.63     | 11.65  | <b>0.60</b>    |
| Ami                | 50  | 200 | 30  | 0.9763 | 0.001947 | 32.26 | 38.07                       | 0.01       | 132.10     | 0.43           | 33.52                   | 4.97     | 24.11  | <b>0.51</b>    |
| <b>Outgroups</b>   |     |     |     |        |          |       |                             |            |            |                |                         |          |        |                |
| Makatao            | 50  | 379 | 41  | 0.9910 | 0.002336 | 38.70 | 38.23                       | 4.91       | 246.99     | <b>0.39</b>    | 35.88                   | 7.97     | 94.36  | 0.27           |
| Tao                | 44  | 127 | 11  | 0.7801 | 0.001617 | 26.79 | 34.79                       | 0.00       | 50.46      | 0.00           | 33.04                   | 0.64     | 2.82   | <b>0.27</b>    |
| Hakka              | 45  | 372 | 39  | 0.9939 | 0.002128 | 35.26 | 34.07                       | 4.25       | 239.35     | <b>0.52</b>    | 32.25                   | 6.42     | 129.92 | 0.32           |
| Minnan             | 50  | 398 | 48  | 0.9984 | 0.002183 | 36.17 | 33.62                       | 5.43       | 294.28     | <b>0.75</b>    | 32.05                   | 7.41     | 430.10 | 0.41           |
| <b>Combined</b>    |     |     |     |        |          |       |                             |            |            |                |                         |          |        |                |
| Highlanders†       | 361 | 512 | 164 | 0.9905 | 0.002253 | 37.32 | 34.65                       | 7.84       | 246.46     | 0.20           | 32.70                   | 10.39    | 79.04  | <b>0.23</b>    |
| Han‡               | 95  | 584 | 86  | 0.9978 | 0.002156 | 35.72 | 33.76                       | 5.06       | 255.99     | <b>0.59</b>    | 31.98                   | 7.27     | 308.82 | 0.25           |

Mismatch analysis, based on 10,000 coalescent simulations in Arlequin 3.5.1.3<sup>6,7</sup>; boldface indicates higher model probability

† Highlanders, 8 highland Formosan tribes combined

‡ Han, Hakka and Minnan combined

Abbrev: n, sample size, S, polymorphic sites, h, haplotypes, hd, haplotype diversity, nd, nucleotide diversity,  $\pi$ , observed mean number of pairwise differences,  $\tau$ , tau value,  $\theta$ , theta, M, migration, *P*(SSD), probability of simulated exceeds observed sum of squares differences

**Table S7. Analysis of molecular variance of the fit between genetic and linguistic models**

| <b>Linguistic model</b> | <b>Source of variation</b>     | <b>% Variance</b> | <b><i>P</i>-value*</b> |
|-------------------------|--------------------------------|-------------------|------------------------|
| Blust†                  | Among groups                   | 13.29             | <0.001                 |
|                         | Within populations             | 86.71             |                        |
| Li                      | Among groups                   | 6.36              | 0.030                  |
|                         | Among population within groups | 7.66              |                        |
|                         | Within populations             | 85.98             |                        |
| Ross                    | Among groups                   | 3.59              | 0.128                  |
|                         | Among population within groups | 10.78             |                        |
|                         | Within populations             | 85.63             |                        |
| Sagart                  | Among groups                   | 4.47              | 0.037                  |
|                         | Among population within groups | 9.83              |                        |
|                         | Within populations             | 85.70             |                        |

\*  $\Phi_{ct}$ , variance among groups, after 10,000 permutations in Arlequin 3.5.1.3

† No population within groups as each is a linguistic branch

**Table S8. Haplogroup frequencies of the 12 Taiwanese groups**

(a) Highland Formosan

|            | Ami | Atayal | Bunun | Paiwan | Puyuma | Rukai | Saisiat | Tsou |
|------------|-----|--------|-------|--------|--------|-------|---------|------|
| A5b1       |     |        | 2     | 2      |        |       |         |      |
| B4a1a      | 10  |        |       | 8      |        | 4     |         | 8.3  |
| B4a1a3     | 12  |        |       |        |        |       |         |      |
| B4a2a      |     | 4      |       | 24     |        | 4     | 4.2     |      |
| B4b1a2     | 8   | 2      | 34    |        |        |       |         | 10.4 |
| B5a2a      | 2   |        | 12    | 8      | 2.6    | 8     | 16.7    | 2.1  |
| C7a        |     |        |       | 4      |        |       |         |      |
| D4a        |     |        |       |        |        |       |         | 2.1  |
| D4i        |     | 2      |       |        |        |       |         |      |
| D5a2       |     |        |       |        |        | 2     |         |      |
| D5b        |     |        | 2     | 12     | 2.6    | 48    |         |      |
| D5b1c1     | 8   |        |       |        | 2.6    |       |         |      |
| D6a2       |     | 4      |       |        |        |       |         |      |
| E1a        | 10  |        |       |        |        |       |         |      |
| E1a1       |     | 2      |       |        |        |       |         |      |
| E1a1a      | 4   | 6      | 4     |        | 5.1    |       | 12.5    | 4.2  |
| E1a1a2     |     |        |       |        | 20.5   |       |         |      |
| E2b1       | 2   | 8      | 2     | 2      | 7.7    |       | 4.2     | 2.1  |
| F1a1d      |     |        | 4     | 2      |        | 2     |         | 8.3  |
| F1a3       |     |        |       |        |        | 2     |         |      |
| F1a3a      |     |        | 4     |        | 17.9   |       |         | 8.3  |
| F1a4a1     | 2   |        | 2     |        |        |       |         | 10.4 |
| F2         |     |        |       | 2      |        |       |         |      |
| F3b1       | 2   |        | 8     | 12     | 28.2   | 20    |         | 4.2  |
| F4b        | 2   | 22     | 18    |        |        |       | 12.5    | 2.1  |
| M7b1'2'4'5 | 22  |        |       |        |        |       |         |      |
| M7b3a      |     | 40     |       | 10     |        |       | 37.5    |      |
| M7c'ef     | 4   |        |       |        |        |       |         |      |
| M7c1       |     |        |       |        |        |       |         | 10.4 |
| M7c3a      | 8   |        | 4     |        | 2.6    |       |         |      |
| M7c3b      |     |        |       | 2      |        |       |         |      |
| M7c3c      | 2   |        | 2     | 12     | 7.7    | 6     |         |      |
| M8a2       | 2   |        |       |        |        |       |         |      |
| N9a10a     |     | 6      |       |        |        |       |         |      |
| Q1         |     |        |       |        |        |       | 8.3     |      |
| R9b1a2     |     |        |       |        |        |       |         | 4.2  |
| R9c1a      |     |        | 2     |        | 2.6    | 4     |         | 22.9 |
| Y2a        |     | 4      |       |        |        |       | 4.2     |      |

(b) Lowland Formosan and other Taiwanese groups

|          | Makatao | Tao  | Hakka | Minnan |            | Makatao | Tao  | Hakka | Minnan |
|----------|---------|------|-------|--------|------------|---------|------|-------|--------|
| A4e1     | 2       |      |       |        | E2b1       | 6       | 2.3  |       |        |
| A5b1     |         |      | 2.2   |        | F1a1a      |         |      | 2.2   |        |
| B4       | 2       |      |       | 4      | F1a1c      |         |      |       | 2      |
| B4a      |         |      | 4.4   |        | F1a1d      |         | 34.1 |       |        |
| B4a1     | 2       |      |       |        | F1a3       | 2       |      |       |        |
| B4a1a    |         |      | 2.2   |        | F1a3a      | 2       |      |       |        |
| B4a1c    |         |      | 6.7   | 4      | F1a4a1     | 4       |      |       |        |
| B4a2a    | 2       | 15.9 | 4.4   |        | F1c1a      |         |      |       | 2      |
| B4b1a    |         |      | 2.2   |        | F1d        |         |      |       | 2      |
| B4b1a2   | 6       |      |       |        | F1g1       |         |      |       | 2      |
| B4b1a2a  | 2       |      |       |        | F2         | 2       |      |       |        |
| B4b1c    |         |      | 2.2   |        | F2a        | 2       |      |       |        |
| B4c1b2   |         |      |       | 2      | F2b1       |         |      | 2.2   |        |
| B4c1b2a2 |         | 36.4 | 2.2   |        | F3a1       |         |      | 2.2   |        |
| B4c1b2c  |         |      | 2.2   | 2      | F3b1       | 4       |      |       |        |
| B4c2     |         |      |       | 2      | F4b        | 2       |      |       |        |
| B4g      |         | 2.3  |       |        | G1a1       | 2       |      |       |        |
| B4h      | 2       |      |       |        | G2b1a      |         |      | 4.4   |        |
| B5a      |         |      | 4.4   |        | G3a1'2     |         |      |       | 2      |
| B5a1a    |         |      |       | 2      | M10a1a2    |         |      | 2.2   |        |
| B5a1c    |         |      |       | 6      | M10a2      | 4       |      |       |        |
| B5a1c1   |         |      | 2.2   |        | M11b       |         |      |       | 2      |
| B5a2a    | 4       |      | 2.2   |        | M7b1'2'4'5 | 4       |      | 2.2   | 6      |
| B5b      |         |      | 2.2   |        | M7b3a      | 8       | 4.5  |       |        |
| B5b2a    |         |      |       | 2      | M7b4       | 2       |      |       | 2      |
| B5b2c    | 2       |      |       |        | M7c1       |         |      | 2.2   | 4      |
| C7       |         |      | 2.2   |        | M7c3       |         |      |       | 2      |
| C7a      | 2       |      | 2.2   | 2      | M7c3a      |         |      | 6.7   |        |
| C7a1     | 2       |      |       |        | M7c3b      |         |      |       | 2      |
| D4       |         |      | 2.2   |        | M7c3c      | 2       |      |       |        |
| D4a      |         |      | 6.7   | 6      | M7c3c1     |         | 4.5  |       |        |
| D4a1     | 2       |      |       |        | M7e        | 2       |      |       | 2      |
| D4a1e    |         |      |       | 2      | M8a2       |         |      | 2.2   |        |
| D4a3b2   |         |      |       | 2      | M9a        |         |      | 2.2   |        |
| D4b2b    |         |      | 2.2   |        | M9a1a      |         |      |       | 4      |
| D4b2b2b  |         |      | 2.2   |        | N11a       | 2       |      |       |        |
| D4j      |         |      |       | 2      | N9a1       |         |      | 2.2   |        |
| D5a2a1b  |         |      | 2.2   | 2      | N9a10      |         |      |       | 2      |
| D5b      | 2       |      |       | 4      | N9a2'4'5   |         |      | 4.4   | 2      |
| D5b1b    |         |      |       | 2      | N9a4       |         |      |       | 2      |
| D5b1c1   |         |      |       | 2      | R9b1a2     |         |      | 2.2   | 4      |
| D5c1     |         |      |       | 2      | R9c1       | 2       |      |       |        |
| D6c      |         |      |       | 2      | R9c1a      | 8       |      |       |        |
| E1a1a    | 2       |      |       |        | Y1         |         |      |       | 2      |
| E1a1a2   | 6       |      | 2.2   |        | Z3         |         |      |       | 2      |



## References:

1. Trejaut, J.A., Kivisild, T., Loo, J.H., Lee, C.L., He, C.L., Hsu, C.J., Lee, Z.Y., and Lin, M. (2005). Traces of archaic mitochondrial lineages persist in Austronesian-speaking Formosan populations. *PLoS Biol* 3, e247.
2. Blust, R. (1999). Selected papers from the Eighth International Conference on Austronesian Linguistics. In Symposium series of the Institute of Linguistics, Academia Sinica, Taipei, Taiwan, E. Zeitoun and P. Li, eds., pp 31-94.
3. Li, P.J.K. (2008). Time perspective of Formosan Aborigines. In *Past Human Migrations in East Asia: Matching Archaeology, Linguistics and Genetics* R.B. A Sanchez-Mazas, M Ross, I Peiros, M Lin, ed. (Routledge), pp 211-218.
4. Ross, M. (2009). Proto Austronesian verbal morphology: A reappraisal. In *Austronesian historical linguistics and culture history: a festschrift for Robert Blust*, A.P. A Adelaar, ed. (Canberra: Pacific Linguistics), pp 295-326.
5. Sagart, L. (2008). The expansion of *Setaria* farmers in East Asia: A linguistic and archaeological model. In *Past Human Migrations in East Asia: Matching Archaeology, Linguistics and Genetics* R.B. A Sanchez-Mazas, M Ross, I Peiros, M Lin, ed. (Routledge), pp 133-167.
6. Excoffier, L., and Lischer, H.E. (2010). Arlequin suite ver 3.5: a new series of programs to perform population genetics analyses under Linux and Windows. *Mol Ecol Resour* 10, 564-567.
7. Excoffier, L. (2004). Patterns of DNA sequence diversity and genetic structure after a range expansion: lessons from the infinite-island model. *Mol Ecol* 13, 853-864.
